1 **The two-component system ChvGI maintains cell envelope**  
2 **homeostasis in *Caulobacter crescentus***

3 Alex Quintero-Yanes<sup>1</sup>, Jérôme Coppine<sup>1, \$</sup>, Aurélie Mayard<sup>1</sup> and Régis Hallez<sup>1,2, #</sup>

4

5 <sup>1</sup> *Bacterial Cell cycle & Development (BCcD), Biology of Microorganisms Research*  
6 *Unit (URBM), Namur Research Institute for Life Science (NARILIS), University of*  
7 *Namur, Namur (5000), Belgium*

8 <sup>2</sup> *WELBIO, University of Namur, Namur (5000), Belgium*

9

10 <sup>\$</sup> *Present address: Syngulon SA, Seraing, Belgium*

11

12

13

14 #Corresponding author: Tel: +32 81 724 244; E-mail: [regis.hallez@unamur.be](mailto:regis.hallez@unamur.be)

15

16 Running title: ChvGI-dependent cell envelope homeostasis

17

18 Key words: Two-component system, cell envelope, PBP, peptidoglycan, osmotic  
19 shock, mecillinam, vancomycin

## 20 **Abstract**

21 Two-component signal transduction systems (TCS) are often used by bacteria to  
22 rapidly assess and respond to environmental changes. ChvG/ChvI is a TCS  
23 conserved in  $\alpha$ -proteobacteria and known for regulating expression of genes related  
24 to exopolysaccharide production, virulence and growth. The sensor kinase ChvG  
25 autophosphorylates upon yet unknown signals and phosphorylates the response  
26 regulator ChvI to activate transcription. Recent studies in *Caulobacter crescentus*  
27 showed that *chv* mutants are sensitive to vancomycin treatment and fail to grow in  
28 synthetic minimal media. In this work, we identified the osmotic imbalance as the main  
29 cause of growth impairment in synthetic minimal media. We also determined the ChvI  
30 regulon and confirmed that ChvI regulates cell envelope architecture at different levels  
31 by controlling outer membrane, peptidoglycan assembly/recycling and inner  
32 membrane proteins. Furthermore, we identified genes with osmoregulatory properties  
33 and confirmed that osmotic upshift is a signal triggering ChvG-dependent  
34 phosphorylation of ChvI. In addition, we challenged *chv* mutants with other cell  
35 envelope related stress and found that targeting with antibiotics the transpeptidation  
36 of peptidoglycan during cell elongation impairs growth of the mutant. Moreover, these  
37 antibiotics activate expression of the *chvIG-hprK* operon in ChvI-dependent and  
38 independent ways. Finally, we observed that the sensor kinase ChvG fused to a  
39 fluorescent protein relocates from a patchy-spotty distribution to distinctive foci after  
40 transition from complex to synthetic minimal media. Interestingly, this pattern of  
41 (re)location has been described for proteins involved in cell growth control and  
42 peptidoglycan synthesis upon osmotic shock. Overall, our data support that the ChvGI

43 TCS is mainly used to maintain cell envelope homeostasis by monitoring osmotic  
44 imbalances and damages in the peptidoglycan layer.  
45

## 46 Introduction

47 Two-component systems (TCS) equip cells with a rapid sensing and response  
48 mechanism to optimise survival in changing and stressful environments. The first  
49 component of canonical TCS, a sensor histidine kinase (HK), autophosphorylates  
50 upon input signal detection on a conserved histidine residue using the gamma-  
51 phosphoryl group of ATP. Thereafter, the HK phosphorylates a conserved aspartate  
52 residue of the second component of TCS, a cognate response regulator (RR). In most  
53 cases, the RR harbours an output domain that binds to DNA upon phosphorylation to  
54 either activate or repress transcription of target genes (Stock *et al.*, 2000; Goulian.  
55 2010; Capra & Laub. 2012). On the other hand, HKs can also exert specific  
56 phosphatase activities on their RRs to turn off the response in absence of the input  
57 signal (Gao and Stock. 2009; TuAnh and Stewart. 2011).

58 The Chv (**ch**romosomal **v**irulence factor) TCS conserved in  $\alpha$ -proteobacteria and  
59 composed of the HK ChvG and the RR ChvI, was first reported as a pathogenic  
60 regulator in *Agrobacterium tumefaciens* responding to acid stress (Mantis & Winans.  
61 1993; Li *et al.*, 2002). A study in *Sinorhizobium meliloti* showed that the ChvG  
62 homologue ExoS is negatively regulated by the periplasmic protein ExoR (Chen *et al.*,  
63 2008). Further research in *A. tumefaciens* showed that low pH triggers ExoR  
64 proteolysis to derepress ChvG/ChvI activity (Wu *et al.*, 2012). ExoR orthologs are  
65 absent in other  $\alpha$ -proteobacteria, such as in the animal intracellular pathogen *Brucella*  
66 *abortus* and the aquatic free-living bacterium *Caulobacter crescentus* (Castillo-  
67 Zéledon *et al.*, 2021; Stein *et al.*, 2021). Nonetheless, the ChvGI-dependent response  
68 to acidic conditions seems to be conserved. For instance, the ChvI homologue BvR

69 in *B. abortus* is phosphorylated in combination of low pH and nutrient depletion  
70 conditions, which mimics post-infection conditions (Altamirano-Silva *et al.*, 2018).

71 In *C. crescentus*, ChvGI activates the expression of the small non-coding RNA (sRNA)  
72 ChvR when exposed to acidic stress or DNA damage with mitomycin C, or when  
73 cultured in synthetic minimal media (Frölich *et al.*, 2018). Once produced, ChvR  
74 subsequently inhibits translation of the TonB-dependent receptor (TBDR) ChvT  
75 (Frölich *et al.*, 2018). Interestingly, inactivating of *chvR* or *chvIG* sensitises *C.*  
76 *crescentus* cells to vancomycin treatment whereas a *chvT* mutant makes them  
77 resistant to this antibiotic, which suggests that vancomycin passes through the outer  
78 membrane via ChvT to reach the periplasm (Vallet *et al.*, 2020). In addition, a *chvIG*  
79 knock-out ( $\Delta$ *chvIG*) mutant could not propagate in synthetic minimal media when cells  
80 are inoculated at low density, while inactivating *chvT* in a  $\Delta$ *chvIG* background partially  
81 restored growth (Stein *et al.*, 2021). Although *chvIG* mutants are sensitive to acid  
82 stress when grown in minimal media, the primary cause for the growth defect has not  
83 been determined.

84 ChvGI is also known in *C. crescentus* to coordinate its regulation with another TCS,  
85 NtrYX, which is under control of the periplasmic protein NtrZ (Stein *et al.*, 2021). NtrZ  
86 has been only described in *C. crescentus*, while the HK NtrY and RR NtrX are known  
87 for regulating multiple processes in  $\alpha$ -proteobacteria such as nitrogen metabolism,  
88 motility, virulence and cell envelope integrity (Pawloski *et al.*, 1991; Carrica *et al.*,  
89 2012; Wang, D *et al.*, 2013; Lemmer *et al.*, 2020). Stein *et al.* (2021) showed that both  
90 ChvI and NtrX networks significantly overlap and these RRs have opposite regulatory  
91 functions in minimal media. For instance, while ChvI acts as a positive regulator of  
92 growth, NtrY inhibits growth. Interestingly, repression of growth in synthetic media is

93 caused by unphosphorylated NtrX, so that inactivating *ntrX* in a  $\Delta$ *chvI* background also  
94 partially restored growth. Actually, NtrY acts as a phosphatase over the  
95 phosphorylated NtrX (NtrX~P), while NtrZ inhibits NtrY to presumably maintain high  
96 NtrX~P levels.

97 Here we show that *chvG* mutants are greatly impacted due to osmotic imbalances in  
98 minimal media, but also in complex media supplemented with osmolytes. In  
99 agreement with previous data (Stein *et al.*, 2021), deletion of *chvT* and *ntrX* restored  
100 growth in hypertonic conditions. We provide a ChvI regulon, using ChIP-seq with  
101 polyclonal anti-ChvI antibodies and RNA-seq, which unveiled new targets related to  
102 peptidoglycan synthesis and recycling. We also showed that (i) ChvI is phosphorylated  
103 upon osmotic shock in a ChvG-dependent way and (ii) expression of the *chvIG-hprK*  
104 operon is induced upon treatment with antibiotics. Overall, our results confirm that the  
105 ChvGI TCS senses and responds to cell envelope stress by inducing expression of  
106 multiple genes related to cell morphology and envelope homeostasis.

107

## 108 **Methods**

### 109 **Bacterial strains and growth conditions.**

110 Strains, plasmids and oligonucleotides used in this study are listed in supplementary  
111 tables 1, 2 and 3. Plasmid construction details are presented in supplementary  
112 methods. *E. coli* strains were grown aerobically in either LB (broth) sigma or LB + 1.5%  
113 agar at 37 °C. All *C. crescentus* strains in this study are derived of the NA1000 wild-  
114 type strain, and growth was achieved at 30 °C in aerated conditions using either  
115 complex medium Peptone Yeast Extract (PYE) or synthetic media supplemented with  
116 glucose (M2G or M5GG) as already described in (Ronneau et al., 2016). M2G and  
117 M5GG were prepared using M2 (12.25 mM Na<sub>2</sub>HPO<sub>4</sub>, 7.75 mM KH<sub>2</sub>PO<sub>4</sub>, 9.35 mM  
118 NH<sub>4</sub>Cl) and M5 (10 mM PIPES pH 7.2, 1 mM NaCl, 1 mM KCl, 0.37 mM Na<sub>2</sub>HPO<sub>4</sub>,  
119 0.23 mM KH<sub>2</sub>PO<sub>4</sub>) salts, respectively, and both supplemented with (0.5 mM MgSO<sub>4</sub>,  
120 0.5 mM CaCl<sub>2</sub>, 0.01 mM FeSO<sub>4</sub>, 0.2% glucose). 1 mM glutamate sodium was added  
121 to make M5GG. Modified M2G 0% (Na<sup>+</sup>, K<sup>+</sup>), M2G 25% (Na<sup>+</sup>, K<sup>+</sup>) and M2G 50% (Na<sup>+</sup>,  
122 K<sup>+</sup>) were prepared without Na<sub>2</sub>HPO<sub>4</sub> and KH<sub>2</sub>PO<sub>4</sub> or either 50% or 25% of the  
123 Na<sub>2</sub>HPO<sub>4</sub> and KH<sub>2</sub>PO<sub>4</sub> concentrations in M2G, respectively. *C. crescentus* was grown  
124 on plates using either PYE or M2G with 1.5% agar at 30 °C. Growth was monitored  
125 measuring OD<sub>660</sub> in liquid cultures using an automated plate reader (Biotek, Epoch 2)  
126 with continuous shaking at 30 °C. Gene expression under the control of inducible  
127 promoter (P<sub>xyIX</sub>) was induced either with 0.1 % D(+)-xylose (Sigma). Expression of  
128 enhanced green fluorescent protein (*egfp*) and monomeric cherry *mcherry* protein  
129 fusions was induced in fresh exponentially growing cultures (OD<sub>660</sub> ~ 0.1) for 1 h and  
130 4 h. Generalized transduction was performed with phage φCr30 according to the  
131 procedure described in (Ely, 1991). Antibiotics for *E. coli* were used with the following

132 final concentrations ( $\mu\text{g ml}^{-1}$ , in liquid/ solid medium) ampicillin (50/100), kanamycin  
133 (30/50), oxytetracycline (12.5/12.5), chloramphenicol (30/20) and for *C. crescentus*  
134 kanamycin (5/20), oxytetracycline (1/2.5), mecillinam (100/100), A22 (2.5,5) where  
135 appropriate. Plasmid delivery into *C. crescentus* was achieved by either bi- or tri-  
136 parental mating using *E. coli* S17-1 and *E. coli* MT607 as helper strains, respectively.  
137 In-frame deletions were created by using the pNPTS138-derivative plasmids as  
138 follows. Integration of the plasmids in the *C. crescentus* genome after single  
139 homologous recombination were selected on PYE plates supplemented with  
140 kanamycin. Three independent recombinant clones were inoculated in PYE medium  
141 without kanamycin and incubated overnight at 30 °C. Then, dilutions were spread on  
142 PYE plates supplemented with 3% sucrose and incubated at 30 °C. Single colonies  
143 were picked and transferred onto PYE plates with and without kanamycin. Finally, to  
144 discriminate between mutated and wild-type loci, kanamycin-sensitive clones were  
145 tested by PCR on colony using locus-specific oligonucleotides.

146

#### 147 **Spotting assays**

148 Ten-fold serial dilutions (in PYE) were prepared in 96-well plates from 5 ml cultures in  
149 standard glass tubes grown overnight at 30 °C in the corresponding media. Cells were  
150 then spotted on plates, were incubated at 30 °C for two days and pictures were taken.

151

#### 152 **$\beta$ -galactosidase assays**

153 Overnight saturated cultures of *Caulobacter* cells harbouring lacZ reporter plasmids  
154 were diluted  $\geq 50\text{X}$  in fresh medium and incubated at 30 °C until OD<sub>660</sub> of 0.3 to 0.5.  
155 100  $\mu\text{l}$  samples were collected in a 96 well plate and kept at -80 °C until measurement.



156 Then, 50  $\mu$ l of aliquots of the previously frozen samples were thaw and immediately  
157 treated with 50  $\mu$ l Z buffer (60 mM Na<sub>2</sub>HPO<sub>4</sub>, 40 mM NaH<sub>2</sub>PO<sub>4</sub>, 10 mM KCl, 1 mM  
158 MgSO<sub>4</sub>, pH 7.0) supplemented with 0.1 g polymyxin B and 0,27 % (v/v)  $\beta$ -  
159 mercaptoethanol for 30 min at 28 °C. To this, 150  $\mu$ l of Z buffer was added, followed  
160 by 50  $\mu$ l of 4 mg/ml O-nitrophenyl-  $\beta$  -D-galactopyranoside (ONPG). Then, ONPG  
161 hydrolysis was measured at 30 °C for 30 min. The activity of the  $\beta$ -galactosidase  
162 expressed in miller units (MU) was calculated using the following equation: MU =  
163  $(OD_{420} \times 1,000) / [OD_{660} \times t \times v]$  where “t” is the time of the reaction (min), and “v” is  
164 the volume of cultures used in the assays (ml). Experimental values were the average  
165 of three independent experiments.

166

## 167 **Microscopy**

168 Strains grown in PYE were imaged either in exponential or stationary phase using 1.5  
169 % agar pads with the indicated medium. Cells in osmotic shock conditions were  
170 pelleted and washed twice with the indicated stress medium and imaged in 1.5 % agar  
171 pads maintaining the stress condition. Images were obtained using Axioskop  
172 microscope (Zeiss), Orca-Flash 4.0 camera (Hamamatsu) and Zen 2.3 software  
173 (Zeiss). Temperature (30 °C) was maintained stable during microscopy analysis using  
174 the Tempcontrol 37-analog 1 channel equipment (HemoGenix®) coupled to the  
175 Axioskop microscope. Images were processed with ImageJ. Demographs were  
176 obtained with MicrobeJ by segmenting each cell, integrating fluorescence, sorting cells  
177 by length and plotting fluorescence intensity and cellular widths to indicate the relative  
178 position of the protein fusions, in which 0 represents mid-cell and 2 or -2 the cell poles  
179 (Ducret *et al.*, 2007).

180

## 181 **Protein purification**

182 In order to immunize rabbits for production of ChvI polyclonal antibodies His6-ChvI  
183 was purified as follows. A BL21(DE3) strain harboring plasmid pET-28a-*chvI* was  
184 grown in LB medium supplemented with kanamycin until an OD<sub>600</sub> of 0.7 was reached.  
185 IPTG (isopropyl-β-D-thiogalactopyranoside) (Thermo Fisher Scientific) was added at  
186 a final concentration of 1 mM, and the culture was incubated at 37 °C for 4 h. Then,  
187 cells were harvested by centrifugation for 20 min at 5,000 *g* and 4 °C. The pellet was  
188 resuspended in 20 ml BD buffer (20 mM Tris-HCl [pH 8.0], 500 mM NaCl, 10%  
189 glycerol, 10 mM MgCl<sub>2</sub>, 12.5 mM imidazole) supplemented with complete EDTA-free  
190 protease cocktail inhibitor (Roche), 400 mg lysozyme (Sigma), and 10 mg DNase I  
191 (Roche) and incubated for 30 min on ice. Cells were then lysed by sonication and the  
192 lysate by centrifugation (12,000 rpm for 30 min at 4 °C) was loaded on a Ni-  
193 nitrilotriacetic acid (Ni-NTA) column and incubated for 1 h at 4 °C with end-over-end  
194 shaking. The column was then washed with 5ml BD buffer, 3ml Wash1 buffer (BD  
195 buffer with 25 mM imidazole), 3ml Wash2 buffer (BD buffer with 50 mM imidazole),  
196 and 3ml Wash3 buffer (BD buffer with 75 mM imidazole). Proteins bound to the column  
197 were eluted with 3ml elution buffer (BD buffer with 100 mM imidazole) and aliquoted  
198 in 300 μl fractions. All the fractions containing the protein of interest (checked by  
199 Coomassie blue staining) were pooled and dialyzed in dialysis buffer (50 mM Tris [pH  
200 7.4], 12.5 mM MgCl<sub>2</sub>).

201

## 202 **Immunoblot analysis**

203 Proteins crude extracts were prepared by harvesting cells from exponential growth  
204 phase ( $OD_{660} \sim 0.3$ ). The pellets were then resuspended in SDS-PAGE loading buffer  
205 by normalizing to the  $OD_{660}$  before lysing cells by incubating them for 10 min at 95 °C.  
206 The equivalent of 0.5 ml of cult ( $OD_{660} = 0.3$ ) was loaded and proteins were subjected  
207 to electrophoresis in a 12% SDS-polyacrylamide gel, transferred onto a nitrocellulose  
208 membrane then blocked overnight in 5% (wt/vol) nonfat dry milk in phosphate buffer  
209 saline (PBS) with 0.05% Tween 20. Membrane was immunoblotted for  $\geq 3$  h with  
210 primary monoclonal anti-GFP (1:5,000) antibodies (JL8, Clontech-Takara), then  
211 followed by immunoblotting for  $\leq 1$  h with secondary antibodies: 1:5,000 anti-mouse  
212 linked to peroxidase (Dako Agilent), and visualized thanks to Clarity™ Western ECL  
213 substrate chemiluminescence reagent (BioRad) and Amersham Imager 600 (GE  
214 Healthcare).

215

216 **Chromatin immunoprecipitation followed by deep sequencing (ChIP-Seq)**  
217 **assay.**

218 A ChIP-Seq protocol was followed as described by Coppine *et al.* (2020). Briefly, 80  
219 ml of mid-log-phase cells ( $OD_{660}$  of 0.6) were cross-linked in 1% formaldehyde and 10  
220 mM sodium phosphate (pH 7.6) at room temperature (RT) for 10 min and then for 30  
221 min on ice. Cross-linking was stopped by addition of 125 mM glycine and incubated  
222 for 5 min on ice. Cells were washed twice in phosphate buffer solution (PBS; 137 mM  
223 NaCl, 2.7 mM KCl, 10 mM  $Na_2HPO_4$ , 1.8 mM  $KH_2PO_4$ , pH 7.4) resuspended in 450  $\mu$ l  
224 TES buffer (10 mM Tris-HCl [pH 7.5], 1mM EDTA, and 100 mM NaCl), and lysed with  
225 2  $\mu$ l of Ready-lyse lysozyme solution for 5 min at RT. Protease inhibitors (Roche) were  
226 added, and the mixture was incubated for 10 min. Then, 550  $\mu$ l of ChIP buffer (1.1%

227 Triton X-100, 1.2 mM EDTA, 16.7 mM Tris-HCl [pH 8.1], and 167 mM NaCl, plus  
228 protease inhibitors) was added to the lysate and incubated at 37 °C for 10 min before  
229 sonication (2 x 8 bursts of 30 sec on ice using a Diagenode Bioruptor) to shear DNA  
230 fragments to a length of 300 to 500 bp. Lysate was cleared by centrifugation for 10  
231 min at 12,500 rpm at 4 °C, and protein content was assessed by measuring the OD<sub>280</sub>.  
232 Then, 7.5 mg of proteins was diluted in ChIP buffer supplemented with 0.01% SDS  
233 and precleared for 1 h at 4 °C with 50 µl of SureBeads Protein A Magnetic Beads  
234 (BioRad) and 100 µg bovine serum albumin (BSA). One microliter of polyclonal anti-  
235 Chv1 antibodies was added to the supernatant before overnight incubation at 4 °C  
236 under gentle agitation. Next, 80 µl of BSA presaturated protein A-agarose beads was  
237 added to the solution and incubated for 2 h at 4 °C with rotation, washed once with  
238 low-salt buffer (0.1% SDS, 1% Triton X-100, 2mM EDTA, 20 mM Tris-HCl [pH 8.1],  
239 150 mM NaCl), once with high-salt buffer (0.1% SDS, 1% Triton X-100, 2mM EDTA,  
240 20 mM Tris-HCl [pH 8.1], 500 mM NaCl), once with LiCl buffer (0.25 M LiCl, 1% NP-  
241 40, 1% deoxycholate, 1mM EDTA, 10 mM Tris-HCl [pH 8.1]), and once with TE buffer  
242 (10 mM Tris-HCl [pH 8.1] 1mM EDTA) at 4 °C, followed by and a second wash with  
243 TE buffer at RT. The DNA-protein complexes were eluted twice in 250 µl freshly  
244 prepared elution buffer (0.1 M NaHCO<sub>3</sub>, 1% SDS). NaCl was added at a concentration  
245 of 300 mM to the combined eluates (500 µl) before overnight incubation at 65 °C to  
246 reverse the cross-link. The samples were treated with 20 µg of proteinase K in 40mM  
247 EDTA and 40 mM Tris-HCl (pH 6.5) for 2 h at 45 °C. DNA was extracted using a  
248 Nucleospin PCR cleanup kit (Macherey-Nagel) and resuspended in 50 µl elution buffer  
249 (5 mM Tris-HCl [pH 8.5]). DNA sequencing was performed using an Illumina HiSeq

250 4000 instrument (Bio.be). NGS data were analysed as described in Coppine et al.,  
251 2020.

252

### 253 **RNA-seq.**

254 WT and  $\Delta chvI$  cells were grown O.N to OD<sub>660</sub> 0.3 and, then, exposed to 6% sucrose  
255 for 4 h. Thereafter, total RNA was extracted with RNeasy® Protect Bacteria Kit from  
256 Qiagen and following manufacturers instructions. The quantity and quality (A260/A280  
257 ration) of RNA was determined with a Thermo Scientific™ Nanodrop™ One  
258 Microvolume UV-Vis Spectrophotometer. Samples were sent for analysis at Bio.BE  
259 company and analysed using Galaxy (Afgan *et al.*, 2018).

260

### 261 ***In vivo* <sup>32</sup>P labelling**

262 Cells were grown overnight in PYE, then washed twice and grown in M5G medium  
263 lacking phosphate and was grown overnight in M5G with 0.05 mM phosphate to OD<sub>660</sub>  
264 of 0.3. Then, one milliliter of culture was labelled for 4 min at 30 °C using 30 μCi γ-  
265 [<sup>32</sup>P]ATP (PerkinElmer). For osmotic shock experiments, samples were incubated with  
266 6% sucrose for 7 minutes at 30 °C. Then, cells were pelleted for 2 minutes at 15000  
267 rpm and the supernatant removed completely without disturbing the pellets. Cell  
268 pellets were resuspended in 50 μl Lysis Buffer (50mM Tris pH 7.0, 150mM NaCl, 80  
269 mM EDTA, 2% Triton X100; sterilised with 2 μm Acrodisc syringe filters) by pipetting.  
270 Lysed samples were incubated 3 minutes on ice. And 450 μl of cold LBS was added  
271 and proteins were collected using centrifugation for 15 minutes at 13000 and 4 °C.  
272 Then, 40 μl of SureBeads Protein A Magnetic Beads (BioRad) were washed 4 times  
273 in 1 ml PBS + 0.1% Tween (PBS-T) and finally resuspended in 65 μl. Thereafter, 3 μl

274 of anti-ChvI antibody were added to the washed protein A-agarose beads and  
275 incubated at RT in a shaker at 1300 rpm. Protein A beads with anti-ChvI antibodies  
276 were washed 3 times with PBS-T and 1 time with cold (4 °C) Low Salt Buffer (LSB;  
277 50mM Tris pH 7.0, 100mM NaCl, 50 mM EDTA, 2% Triton X100; sterilised with 2  $\mu$ m  
278 Acrodisc syringe filters), immediately resuspended in 50  $\mu$ l LSB and kept in ice. ChvI  
279 immunoprecipitation (IP) was performed by adding the Protein A beads with anti-ChvI  
280 antibodies previously prepared to the cell-free protein samples, and incubating at 4 °C  
281 with rotation for 90 minutes. IP samples were washed 1 time in 1ml LSB and 3 times  
282 in 1 ml High Salt Buffer (50mM Tris pH 7.0, 500mM NaCl, 50 mM EDTA, 0.1% Triton  
283 X100; sterilised with 2  $\mu$ m Acrodisc syringe filters). Samples were eluted using 25  $\mu$ l  
284 of 2,5X SDS-loading Buffer and incubation at 37 °C for 5 minutes. Samples with SDS  
285 loading Buffer were separated from magnetic beads, and 20  $\mu$ l loaded on a SDS-Page  
286 gel and run at 200V-50mA-100W. The gel was dried for 1h at 70 °C under vacuum in  
287 a Model 583 Gel Dryer (BioRad). Finally, the dried gel was exposed on phosphoscreen  
288 for 5 days and revealed using a Cyclone Plus Phosphor Imager (PerkinElmer).  
289  
290

## 291 **Results**

### 292 **High osmolyte concentration in M2G impairs growth of *chvIG* mutants**

293 It was shown previously that *C. crescentus chvIG* mutants failed to grow in minimal  
294 media with xylose as sole carbon source (M2X), while these mutants grew similarly to  
295 WT cells in complex media (PYE) (Stein *et al.*, 2021). Likewise, we observed that  
296 mutants inoculated in M2G (with glucose as sole carbon source) in both solid and  
297 liquid media were impaired for growth (Fig. 1A-B). To date, the cause for growth  
298 impairment in *chvIG* mutants in minimal media has not been determined. Considering  
299 that stressful conditions are present in synthetic minimal media (M2G or M2X) but  
300 missing in PYE, we tested osmolytes as causative agents. Indeed, the synthetic  
301 minimal media M2G contains a higher concentration of osmolytes than the complex  
302 media PYE (Hocking *et al.*, 2012). Therefore, we assessed the viability of *chvIG*  
303 mutants on plates lacking Na<sup>+</sup> and K<sup>+</sup> salts (Fig. 1A; M2G 0% Na<sup>+</sup>, K<sup>+</sup>). In these  
304 conditions the *chvI* mutant grew similarly to WT cells. We also reduced these  
305 osmolytes in liquid cultures, and observed that growth was restored in the *chvI* mutant  
306 when half (and below) of the regular concentration found in M2G was used (Fig. 1B;  
307 M2G 50% Na<sup>+</sup>, K<sup>+</sup>). Furthermore, we observed that adding osmolytes (NaCl or  
308 sucrose) to complex media impaired growth and decreased viability of a *chvI* mutant  
309 (Fig. 1A; PYEX + 40 mM NaCl; PYE + 6% Sucrose). Additionally, ectopic expression  
310 of *chvI* from the xylose-inducible promoter ( $P_{xyIX}::chvI$ ) in a *chvI* mutant restored growth  
311 in PYEX plates supplemented with NaCl whereas expressing back *chvI* in a *chvIG*  
312 mutant did not (Fig. 1A). Finally, while a phospho-mimetic mutant of *chvI* (*chvI<sub>D52E</sub>*)  
313 grew similarly to WT, a phospho-ablative mutant of *chvI* (*chvI<sub>D52A</sub>*) failed to propagate

314 in M2G (Fig. 1C). Together, our data show that a fully functional ChvIG TCS is required  
 315 to survive and grow in hyperosmotic environments.  
 316

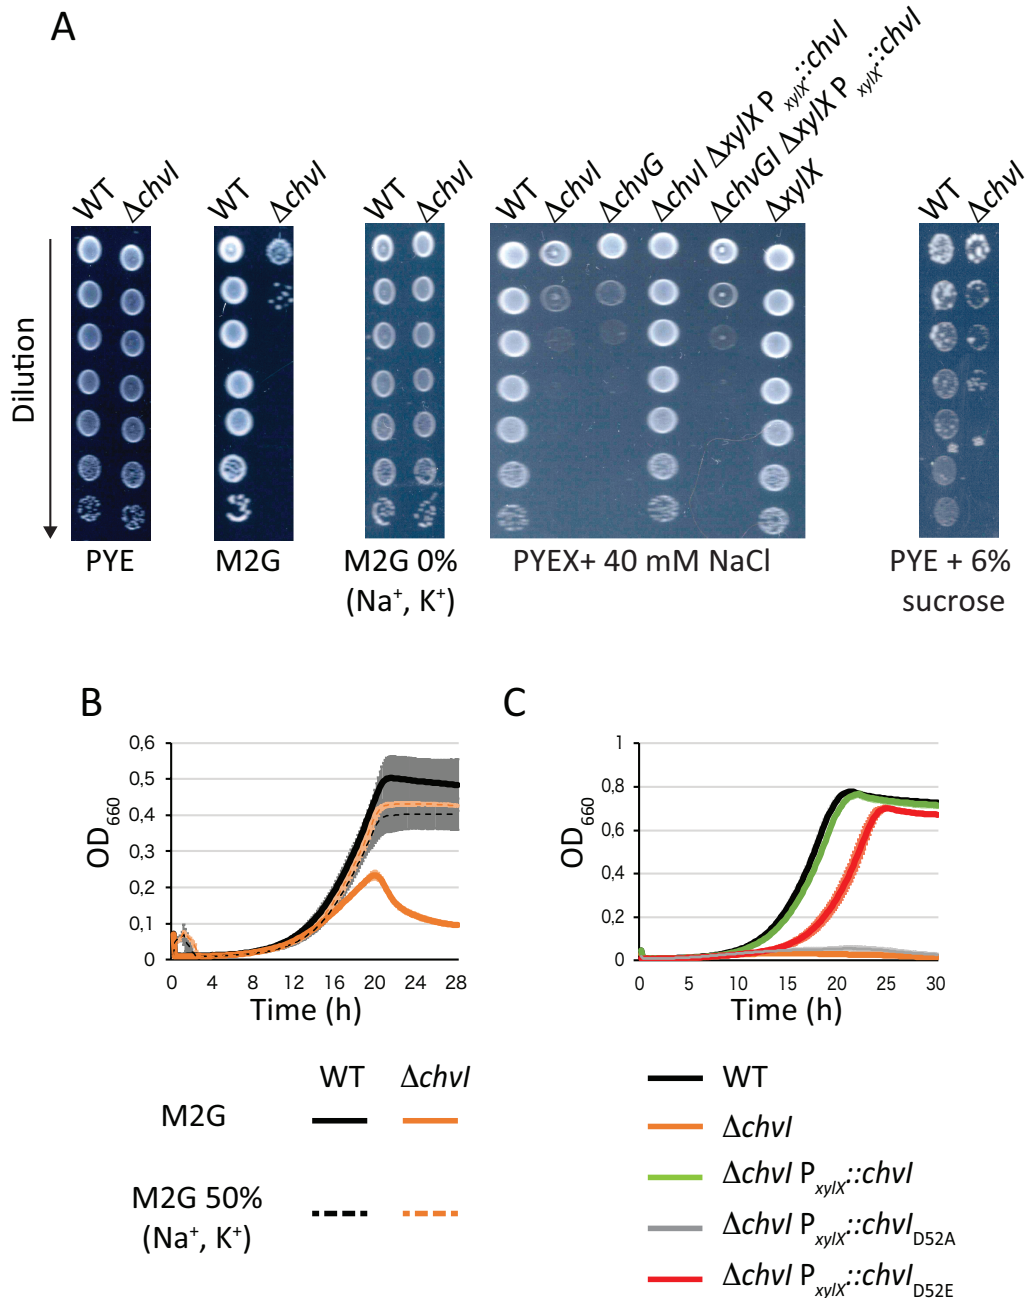

317

318

319

320

321

**Fig. 1. Viability and growth of *chvGI* mutants upon hyperosmotic conditions.** (A) Viability of WT and  $\Delta chvI$  cells in complex (PYE) and synthetic minimal media (M2G) plates with varying osmolyte concentrations. For complementation assays, PYE was supplemented with 0.1% xylose (PYEX). (B) Growth in minimal media with 100% (solid lines) or 50% (dashed lines) Na<sub>2</sub>HPO<sub>4</sub> and KH<sub>2</sub>PO<sub>4</sub> concentrations referred to M2G. (C) Growth in M2G of mutants complemented with *chvI* copies from either WT, phospho-ablative (*chvI*<sub>D52A</sub>) or phospho-mimetic (*chvI*<sub>D52E</sub>) mutants. Data in (B) and (C) represent the average value of biological replicates (n=3, error bars show standard deviation).



322

323 **Mutations in *chvT* and *ntrX* improve fitness of the *chvI* mutant under osmotic**  
324 **stress**

325 Considering that mutations in *chvT* and *ntrX* partially alleviated the growth impairment  
326 of *chvI* mutants in minimal media (Stein *et al.*, 2021), we tested whether *chvT* or *ntrX*  
327 inactivation could also partially protect *chvI* mutants from hypertonic conditions. We  
328 first confirmed that a  $\Delta$ *chvI* mutant was impaired for growth under osmotic stress by  
329 using an excess of KCl in PYE (Fig. 2A). In contrast, neither *ntrX* nor *chvT* inactivation  
330 did interfere with growth in PYE + KCl conditions compared to WT (Fig. 2A).  
331 Interestingly, we observed that inactivating *ntrX* in a  $\Delta$ *chvI* background restored growth  
332 similar to WT, while the  $\Delta$ *chvT* mutation led to cultures with slightly higher OD in liquid  
333 cultures. Thus, these data suggest that growth impairment in liquid upon osmotic  
334 upshift in a *chvI* mutant is primarily caused by upregulation of ChvT or NtrX.

335 As expected,  $\Delta$ *chvI* cells poorly grew on PYE plates supplemented with KCl whereas  
336 the growth of  $\Delta$ *chvT* cells was similar to the WT on the same plates (Fig. 2B).  
337 Surprisingly, in contrast to liquid cultures (Fig. 2A), we observed that  $\Delta$ *ntrX* cells did  
338 not grow as the WT in PYE plates but this growth delay was not aggravated in the  
339 presence of KCl excess (Fig. 2B). Nevertheless, inactivating either *ntrX* or *chvT* in a  
340  $\Delta$ *chvI* background partially restored growth on KCl plates (Fig. 2B). These data  
341 indicate that additional cell envelope defects in *chvI* mutants are responsible for growth  
342 impairment on hypertonic plates. Altogether, these data suggest that the homeostasis  
343 of the cell envelope is lost in *chvI* mutants, leading to a hypersensitivity to osmolytes.

344

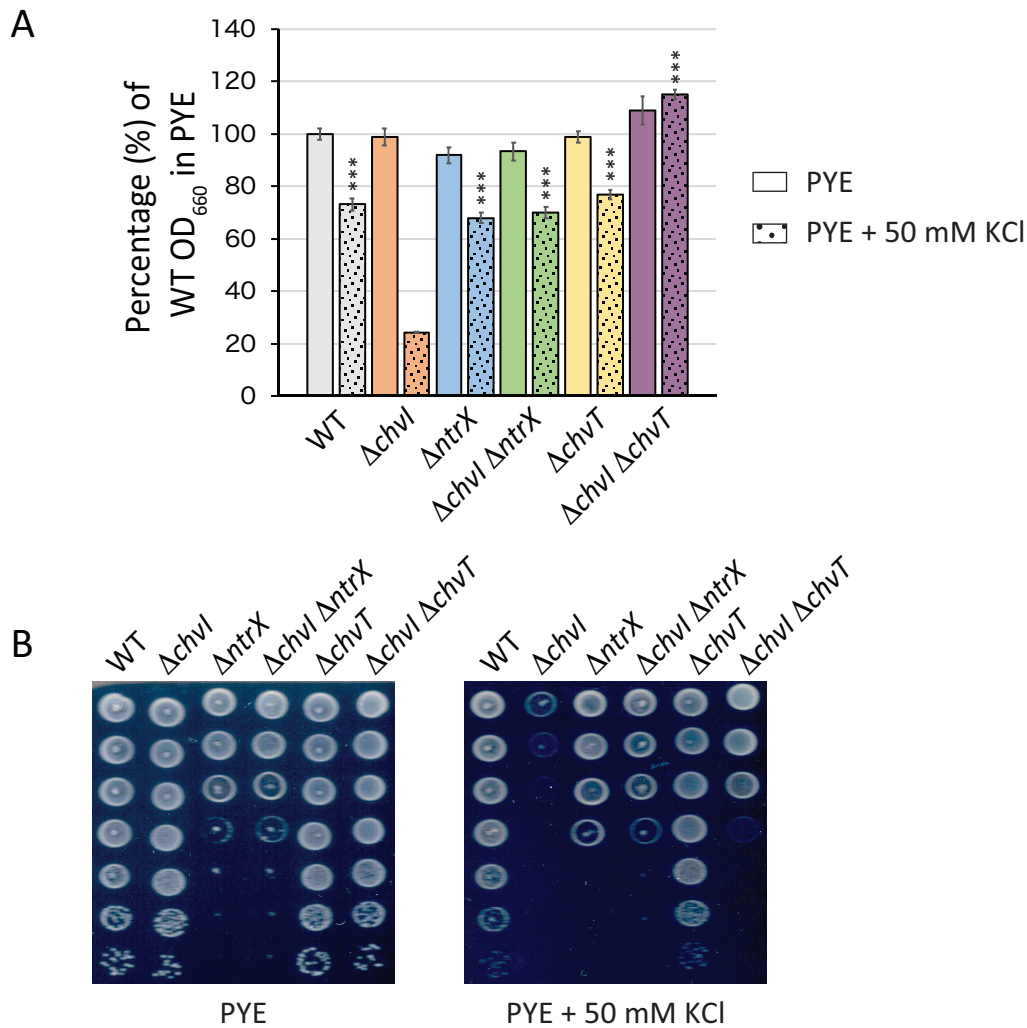

345

346

347

348

349

**Fig. 2. Growth and viability of *chvI*, *chvT* and *ntrX* mutants in hypertonic conditions.** (A) Percentage of optical density (OD<sub>660</sub>) after 22 hrs of growth in PYE liquid with (dotted bars) or without 50 mM KCl (solid bars). The data represent the average values of biological replicates (n=3, error bars show standard deviation). \*\*\* =  $p < 0.0001$ , single factor ANOVA analysis of OD<sub>660</sub> after 22 hrs of growth in PYE supplemented with 50 mM KCl compared  $\Delta chvI$  cells. (B) Viability of single ( $\Delta chvI$ ,  $\Delta chvT$  and  $\Delta ntrX$ ) and double ( $\Delta chvI \Delta chvT$  and  $\Delta chvI \Delta ntrX$ ) mutants on PYE agar with or without 50 mM KCl.

350

## **ChvI regulon reveals osmotic stress and cell envelope-related target genes**

351

Transcriptomic analyses were previously performed on a  $\Delta chvI$  mutant overexpressing

352

the phospho-mimetic mutant *chvI*<sub>D52E</sub> in PYE (Stein *et al.*, 2021). Nonetheless, cells

353

expressing *chvI*<sub>D52E</sub> as the only copy, either from its own promoter at the endogenous

354

*chvI* locus ( $P_{chvI}::chvI_{D52E}$ ) or ectopically from the xylose-inducible promoter

355

( $P_{xyIX}::chvI_{D52E}$ ) led to a slight growth delay and cell filamentation (Fig. 1C and Fig. S1).

356 This suggests either that ChvI<sub>D52E</sub> does not perfectly mimic phosphorylated ChvI or  
357 that unphosphorylated ChvI is also required for optimal growth in synthetic minimal  
358 media. Hence, we determined the ChvI regulon of WT cells grown in M2G by using  
359 ChIP-seq with polyclonal antibodies targeting ChvI, which allowed to unveil the DNA  
360 regions directly bound by ChvI (Fig. 3A, Supplementary table 4).

361 From our experiment, 169 DNA binding sites were identified for ChvI (Fig. 3A, Table  
362 S4). About 30% of them (52) correspond to sequences in the vicinity of 101 genes  
363 previously identified in the regulon of ChvI<sub>D52E</sub> in PYE. The 117 remaining peaks  
364 correspond to promoter regions of potentially new candidates. Interestingly, the top  
365 target is the promoter region of *chvT* itself, suggesting that ChvI regulates ChvT both  
366 (i) directly at the transcriptional level and (ii) indirectly at the post-transcriptional level  
367 via transcriptional activation of the sRNA *chvR* (Fig. 3A). Beside *chvT* and *chvR*, we  
368 identified potential new targeted genes involved in (i) cell division, morphology and  
369 peptidoglycan (PG) synthesis, such as *mreB*, *ftsZ*, *ftsN* and *dipM*; and (ii) general  
370 stress response (GSR), such as *sigT* (sigma factor T), *nepR* (*sigT* antagonist) and  
371 *phyKR* (TCS regulating NepR activity negatively).

372 By performing RNA-seq on WT and  $\Delta$ *chvI* cells grown in PYE and incubated a few  
373 hours in PYE supplemented with 6% sucrose, we found 169 genes with  $\geq 1.5$ -fold  
374 change (Supplementary Table 4). From these binding sites,  $\sim 69\%$  correspond to  
375 genes identified in our ChIP-seq experiment and  $\sim 31\%$  to genes identified in the  
376 previous regulon generated by Stein *et al.* (2021) (Table S4). To further confirm some  
377 of the new targeted genes, we tested their expression by measuring their promoter  
378 activity upon osmotic shock. As shown in Fig 3B, the activity of *dipM* and *ftsN*  
379 promoters was significantly lower in the *chvI* mutant compared to WT, while *phyR*

380 promoter activity was significantly higher in  $\Delta chvI$  than in WT. In contrast, the *nepR*  
381 promoter had similar activity in both WT and  $\Delta chvI$  strains. These results suggest that  
382 ChvI can work as an activator (e.g. *dipM* and *ftsN*) or a repressor (e.g. *phyR*) of gene  
383 expression.  
384 Interestingly, *hprK* is part of the SigT regulon determined upon osmotic shock (Tien *et*  
385 *al.*, 2018). Given that *hprK* is part of the same operon as *chvIG*, we tested whether the  
386 entire operon *chvIG-hprK* could be under the control of SigT. Consistently, we found  
387 that the *chvI* promoter ( $P_{chvI}$ ) was significantly higher in the  $\Delta sigT$  mutant compared to  
388 WT whereas the activity of  $P_{chvI}$  was strongly reduced in the  $\Delta chvI$  mutant (Fig. S2A).  
389 Thus, SigT is a negative regulator of ChvI while ChvI is subjected to a positive  
390 feedback loop. Considering that *phyR* promoter activity was higher in a  $\Delta chvI$   
391 background (Fig. 3C), this indicates that ChvI regulates negatively SigT by inhibiting  
392 PhyR. Together, these data suggest that both SigT and ChvI antagonise each other.  
393 Overall, our data show that ChvI controls the expression of genes involved in cell  
394 envelope homeostasis, in response to osmotic stress.

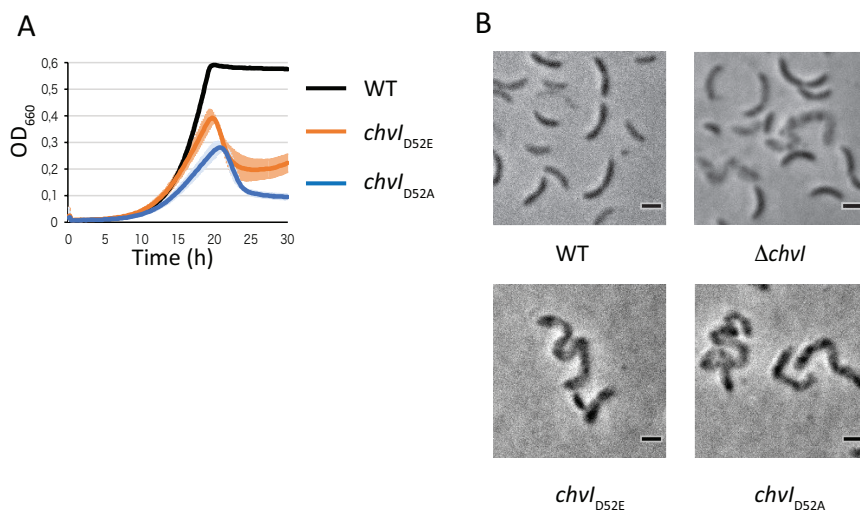

395

396

397

**Figure S1. Growth and morphology of *chvI* mutant strains in synthetic minimal media.** (A) Growth of WT, *chvI*<sub>D52E</sub> and *chvI*<sub>D52A</sub> mutant strains in M2G. The data represent the average values of biological replicates (n=3, error bars show standard deviation). (B) Morphology of WT,  $\Delta chvI$ , *chvI*<sub>D52E</sub> and *chvI*<sub>D52A</sub> cells after 48 hrs of incubation in M2G. Scale bars in microscopy images correspond to 1  $\mu$ m.

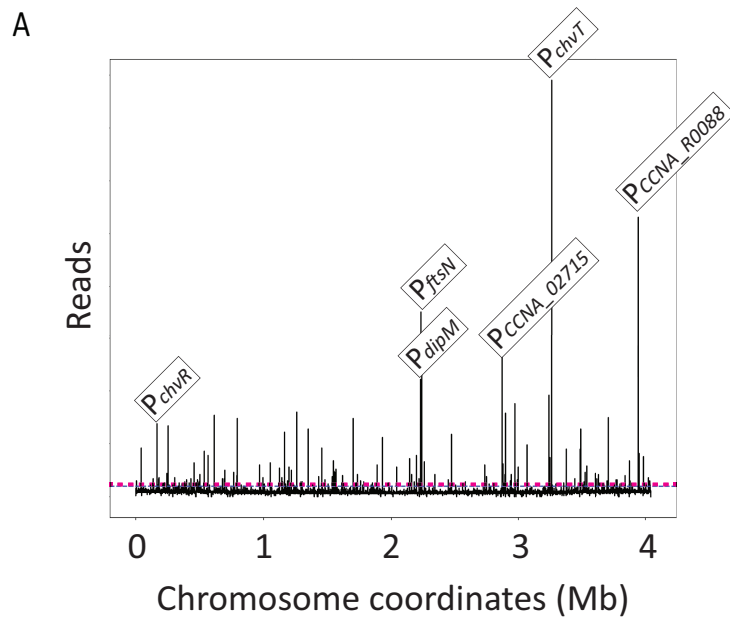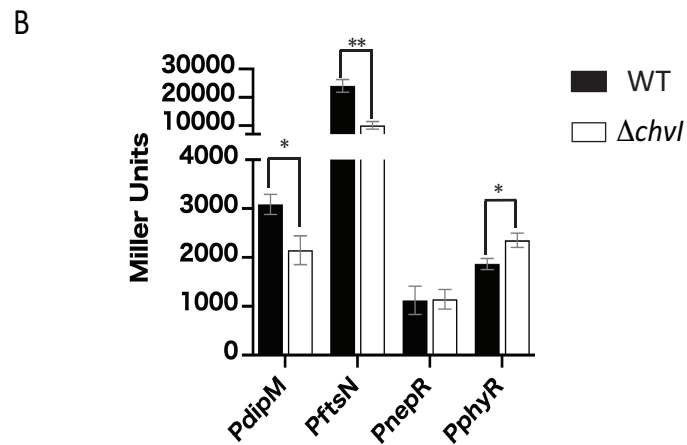

398

399

400

401

402

403

404

**Fig. 3. ChvI target genes determined by ChIP-seq and validated by  $\beta$ -galactosidase assays.** (A) Genome-wide occupancy of ChvI on the chromosome of *C. crescentus* determined by ChIP-seq on WT strain grown in M2G. The x-axis represents the coordinates on the genome (Mb), the y-axis shows the normalized ChIP-Seq read abundance in reads. Some top hits, corresponding to the promoter regions of *chvT*, *CCNA\_R0088*, *ftsN*, *CCNA\_02715*, *chvR* and *dipM* operon, are highlighted. (B) Activity of the *dipM*, *ftsN*, *nepR* and *phyR* promoters (Miller Units) in WT (black bars) and  $\Delta chvI$  (white bars) cells grown in PYE. The data represent the average values of biological replicates (n=3, error bars show standard deviation). \* =  $p < 0.05$ , \*\* =  $p < 0.01$ , single factor ANOVA analysis of  $\beta$ -galactosidase activity.

A

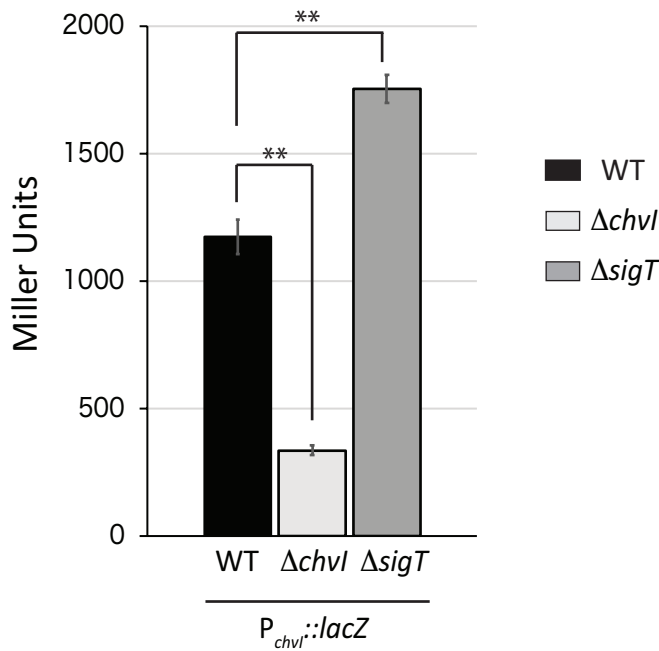

405

406 **Figure S2. Activity of the *chvI* promoter is regulated by the sigma factor T.** (A) Activity of  
407 the *chvI* promoter (Miller Units) in WT (black bars),  $\Delta chvI$  (light grey bars)  $\Delta sigT$  (dark grey  
408 bars) grown in PYE. The data represent the average values of biological replicates (n=3, error  
409 bars show standard deviation). \*\* = p < 0.01 Single factor ANOVA analysis of  $\beta$ -galactosidase  
410 activity.

409

### 410 ChvI is phosphorylated under osmotic upshift

411 Since both single  $\Delta chvG$  and  $\Delta chvI$  mutants are sensitive to osmotic upshift (Fig 1A),  
412 this suggests that ChvI might be phosphorylated and activated by ChvG in such  
413 stressful conditions. We tested this hypothesis by determining the *in vivo*  
414 phosphorylated levels of ChvI (ChvI~P) with or without osmotic shock. In order to  
415 facilitate uptake of [ $\gamma$ - $^{32}$ P] ATP, *Caulobacter* cells are grown in a medium depleted for  
416 the phosphate salts  $Na_2HPO_4$  and  $KH_2HPO_4$  (M5GG). Hence,  $K^+$  and  $Na^+$   
417 concentrations in M5GG are respectively 1.01 mM and 1.02 mM, which is much less  
418 than in M2G (7.75 mM of  $K^+$  and 12.25 mM of  $Na^+$ ). At such low concentrations of  
419 osmolytes, the  $\Delta chvI$  strain grew, as expected, similarly to WT in M5GG (Fig. 4A). In  
420 contrast and in agreement with our previous findings, the growth of the  $\Delta chvI$  mutant

421 was severely impaired in M5GG supplemented with 6% sucrose compared to WT (Fig.  
422 4A). Consistent with these data, we observed that ChvI was barely phosphorylated in  
423 WT grown in M5GG while no ChvI~P was detected in  $\Delta chvG$  (Fig. 4B). More  
424 importantly, ChvI was hyperphosphorylated in cells grown under osmotic shock with  
425 sucrose (Fig. 4C-D).

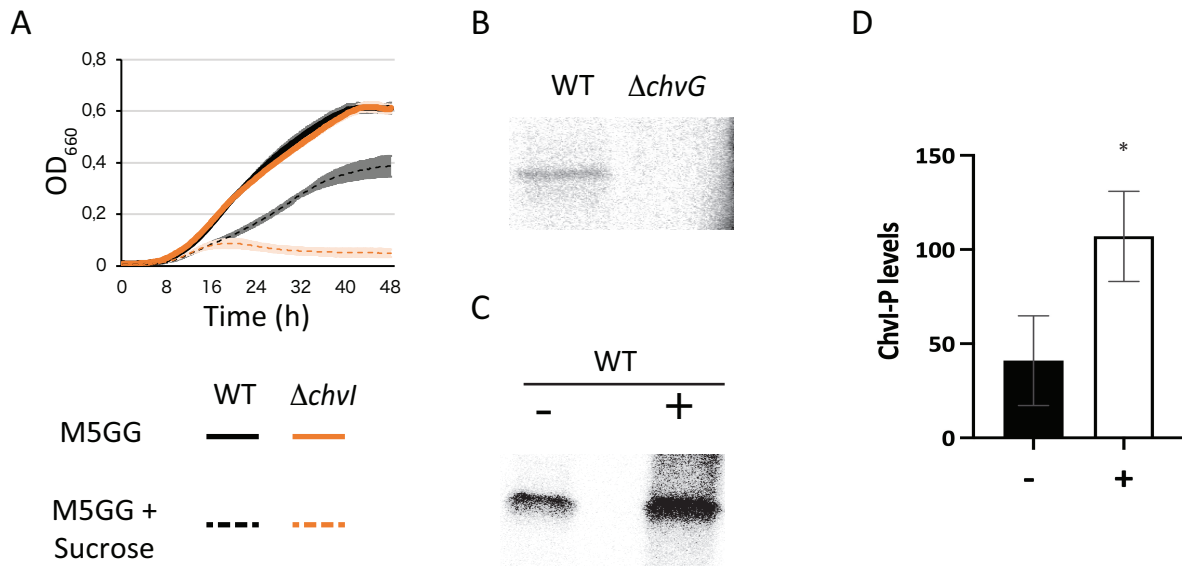

426

427 **Fig. 4. ChvG-dependent phosphorylation of ChvI is stimulated upon osmotic shock.** (A)  
428 Growth of WT (black) and  $\Delta chvI$  mutant (orange) in M5GG with (dashed lines) or without  
429 (solid lines) 6% sucrose. The data represent the average value of biological replicates ( $n=3$ ,  
430 error bars show standard deviation). (B) *in vivo* phosphorylation levels of ChvI in WT and  
431  $\Delta chvG$  mutant grown in M5GG. (C) *in vivo* phosphorylation levels of ChvI in WT grown in  
432 M5GG without (-) or with (+) 6% sucrose. (D) Quantified *in vivo* phosphorylation levels of  
ChvI in the same growth conditions than in (C). The data represent the average values of  
biological replicates ( $n=3$ , error bars show standard deviation). \* =  $p < 0.05$ , single factor  
ANOVA analysis of ChvI phosphorylation.

432

### 433 ChvGI is sensitive to peptidoglycan synthesis inhibition

434 Stress response systems surveying cell envelope homeostasis in Gram-negative  
435 bacteria are sensitive to different stressful conditions including osmotic shock  
436 (Humphreys *et al.*, 1999; Jubelin *et al.*, 2005; Laubacher & Ades. 2008; Cho *et al.*,  
437 2014). Therefore, we first tested growth and viability in other cell envelope stressors,

438 such as acidic pH, detergent and antibiotics targeting the outer membrane or the PG  
439 synthesis machinery. We did not observe significant impacts on fitness between WT  
440 and  $\Delta chvI$  cells under treatment with acidic stress (Fig. 5A), A22 drug targeting the  
441 actin-like protein MreB (Fig. 5B, D), SDS and polymyxin B detergents (Fig. S3A-B). In  
442 contrast, exposure to mecillinam, which inhibits the the penicillin binding protein 2  
443 (PBP2) transpeptidase activity thereby obstructing PG crosslinking during elongation,  
444 significantly impaired growth of  $\Delta chvI$  compared to WT (Fig. 5C-D). Considering that  
445 a *chvI* mutant was also sensitive to vancomycin (Vallet *et al.*, 2018), which targets the  
446 D-Ala-D-Ala moiety of the PG precursors thereby inhibiting PG crosslinking, we  
447 assessed the impact of both vancomycin and mecillinam on the *chvI* promoter activity  
448 in synthetic media M5GG (Fig. 5.E). We observed that growth was severely affected  
449 in the  $\Delta chvI$  mutant after six hours of growth with mecillinam and to a lesser extent  
450 with vancomycin. In comparison to untreated cells, the activity of the  $P_{chvI}::lacZ$   
451 transcriptional reporter significantly increased after six hours of exposure to mecillinam  
452 while vancomycin treatment did not influence *chvI* expression. Interestingly, although  
453 the activity of  $P_{chvI}::lacZ$  decreased in  $\Delta chvI$  cells treated with mecillinam, it remained  
454 significantly higher than in the untreated  $\Delta chvI$  cells. These data suggest that upon  
455 mecillinam treatment, the expression of the *chvIG-hprK* operon is induced not only by  
456 ChvI itself but also in a ChvI-independent way.

457

458



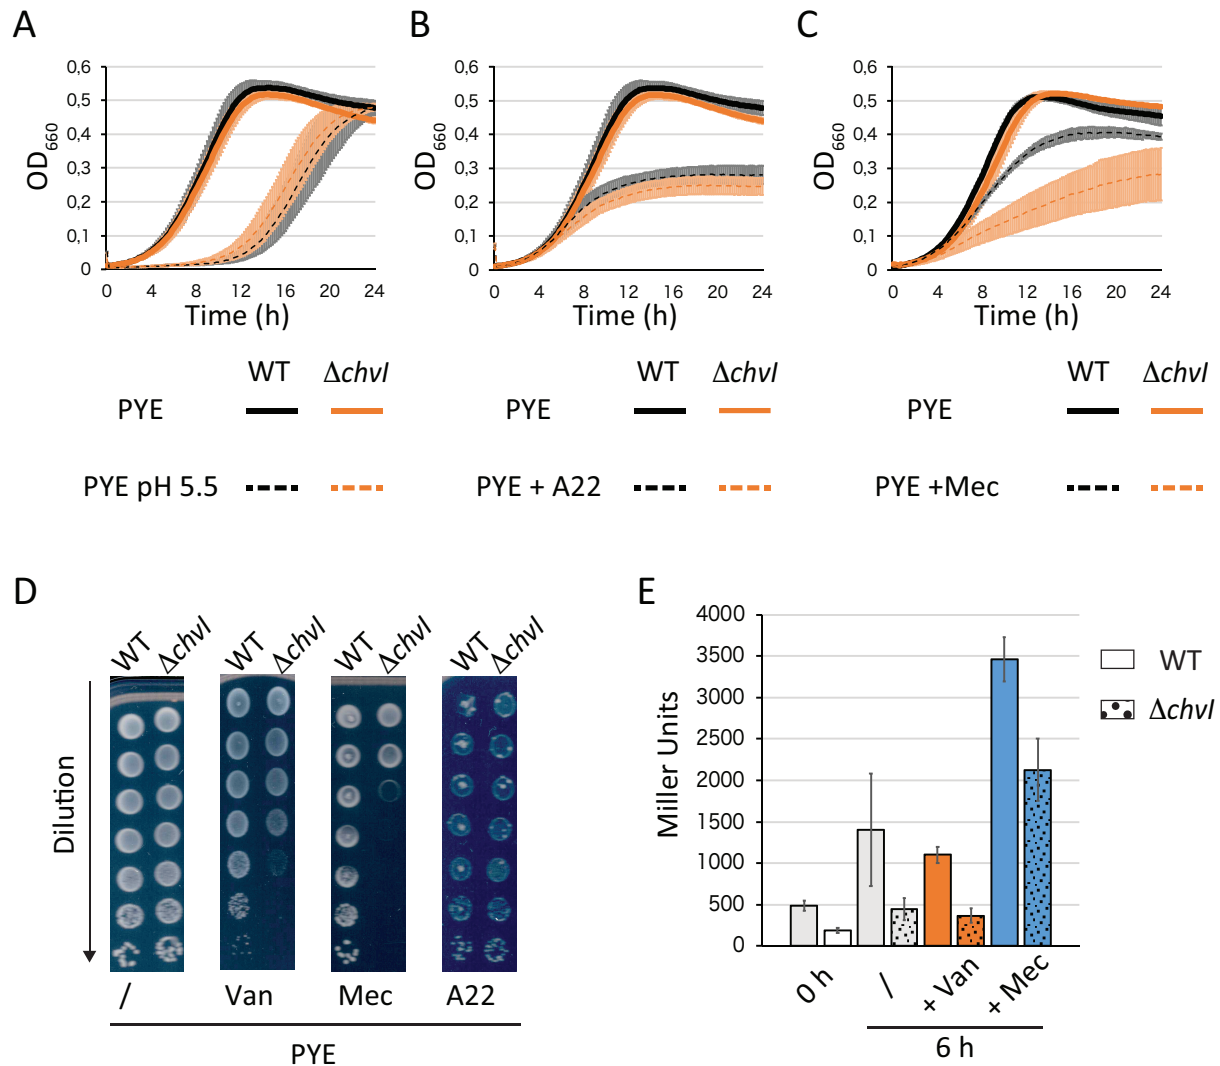

459

460

461

462

463

464

465

**Fig. 5. Chvl expression is activated upon mecillinam treatment (A-C)** Growth of WT and  $\Delta chvl$  mutant cells in PYE at acidic pH 5.5 (A) or supplemented with either A22 (B) or mecillinam (C). (D) Viability of WT and  $\Delta chvl$  mutant upon treatment with mecillinam (Mec) and A22. (E) Activity of the *chvl* promoter (Miller Units) in WT (solid bars) and  $\Delta chvl$  (dashed bars) cells grown in minimal media M5GG treated for 6 hrs with vancomycin (Van) or mecillinam (Mec). The data in figures (A-C) and (E) represent the average values of biological replicates (n=3, error bars show standard deviation). The drugs were used at the following concentrations: A22 (2.5  $\mu\text{g ml}^{-1}$ ), vancomycin (10  $\mu\text{g ml}^{-1}$ ) and mecillinam (100  $\mu\text{g ml}^{-1}$ ).

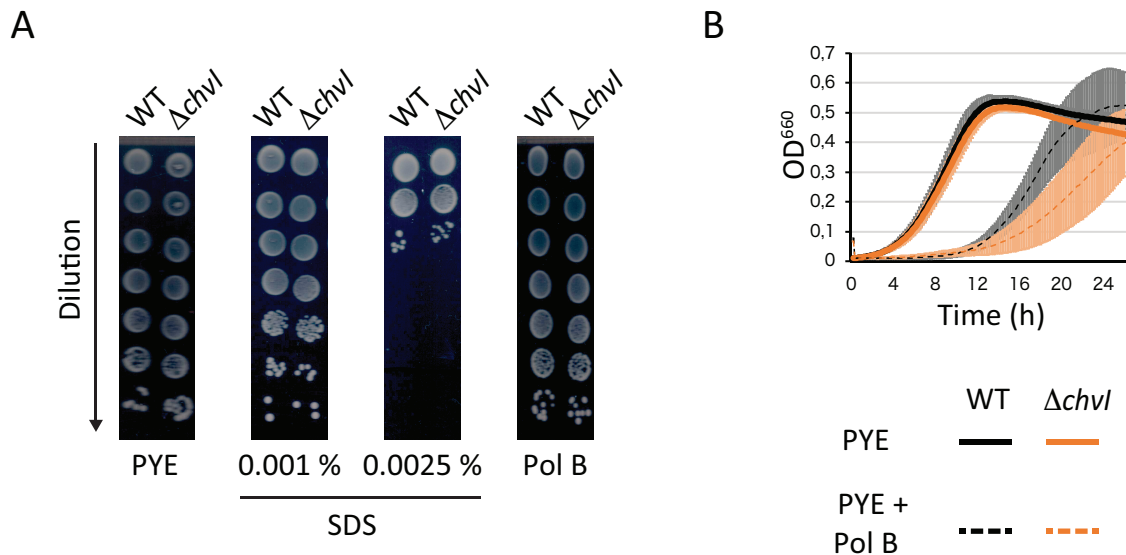

466

467

468

469

470

**Figure S3.  $\Delta chvI$  is not sensitive to SDS and polymixin B treatment.** (A) Viability of  $\Delta chvI$  cells on plates supplemented with 0.001 % or 0.0025% sodium dodecyl sulfate (SDS), 10  $\mu\text{g ml}^{-1}$  polymixin B (Pol B). (B) Growth of WT (black) and  $\Delta chvI$  (orange) cells in PYE with (dashed lines) or without (solid lines) 5  $\mu\text{g ml}^{-1}$  polymixin B (Pol B).

471

### 472 **ChvG relocates from patchy-spotty to midcell upon osmotic shock**

473 Intriguingly, the HK ChvG was previously found in an automated large scale analysis

474 for protein localisation as displaying a patchy-spotty distribution typically observed with

475 PG-related proteins (Werner *et al.*, 2009). Therefore, we constructed fluorescent

476 protein fusions to analyse ChvG and ChvI localisation patterns on PYE and M2G pads.

477 First, we confirmed that GFP fusions to the N- or C-terminal extremity of ChvG or ChvI

478 were stable and functional, as attested by western blot analyses and growth assays

479 (Fig. S4AB). Then, fluorescent microscopy images showed that both ChvG N- and C-

480 terminal fusions to GFP displayed patchy-spotty localisation patterns in cells grown in

481 PYE or M2G cultures (Fig. 6A, Fig. S4C). We also confirmed the patchy-spotty

482 localisation pattern for the ChvG C-terminal fusion to GFP in high resolution confocal

483 microscopy (Fig. S4D). Surprisingly, when cells grown in PYE were washed in M2G  
484 and imaged on M2G agar pads, we observed some cells formed foci at mid-cell (Fig.  
485 6A). In contrast, cells grown in M2G, washed with PYE and imaged on PYE pad kept  
486 their patchy-spotty localisation pattern (Fig. 6A). This relocation is reminiscent to what  
487 was described for the PG-related proteins RodA, PBP2 and PBP1A, whose  
488 localization changed from a typical patchy-spotty distribution to mid-cell when cells  
489 were shifted from PYE to M2G agarose pads (Hocking *et al.*, 2012).

490 In contrast to ChvG, none of the ChvI fusions to GFP (ChvI-GFP and GFP-ChvI)  
491 displayed patchy-spotty localization. Instead, the signal was diffused all over the cell  
492 body, indicating that the protein remains diffuse in the cytoplasm. Neither, we could  
493 observe foci formation in these mutants after transition from PYE to M2G pads (Fig.  
494 6B and data not shown). Then, we wanted to assess if the catalytic activity had any  
495 impact on the protein localisation. For that, we fused GFP to a full-length catalytic  
496 mutant of ChvG to (ChvG<sub>H309N</sub>), which like  $\Delta chvG$  was unable to grow on M2G (Fig.  
497 S4E-D). We observed that, similar to the WT ChvG-GFP, the ChvG<sub>H309N</sub>-GFP showed  
498 a patchy-spotty pattern when cells were grown in PYE and relocated at mid-cell when  
499 shifted from PYE to M2G (Fig. 6C). However, we noticed that the fluorescent foci were  
500 more conspicuous in populations of cells expressing ChvG<sub>H309N</sub>-GFP fusions than the  
501 ones expressing ChvG-GFP. Thus, our data suggest that ChvG co-localizes with PG  
502 synthesis machinery independently of its kinase activity.

A

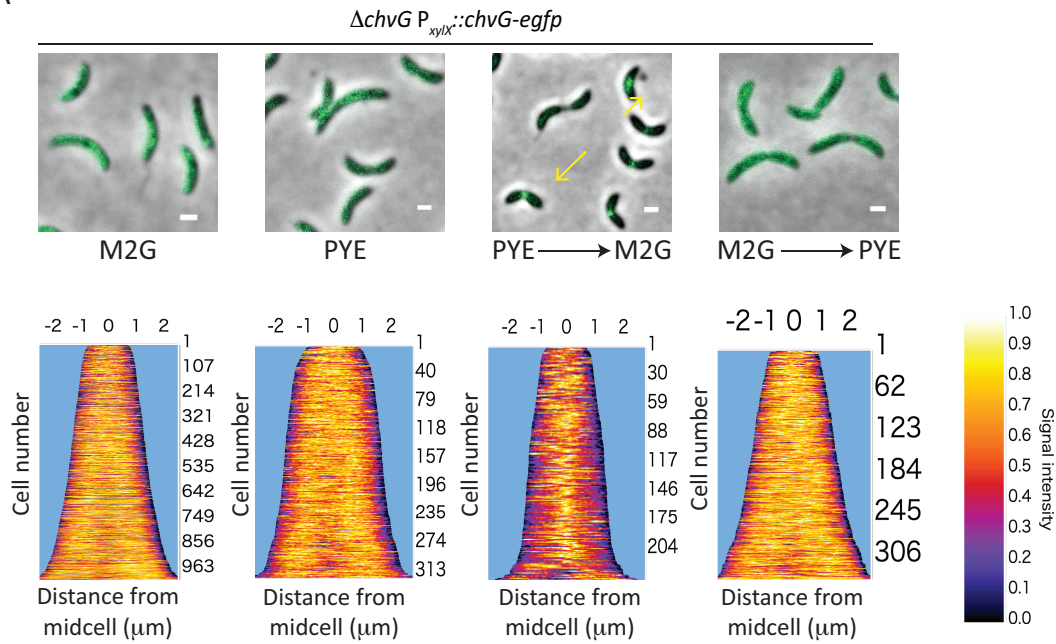

B

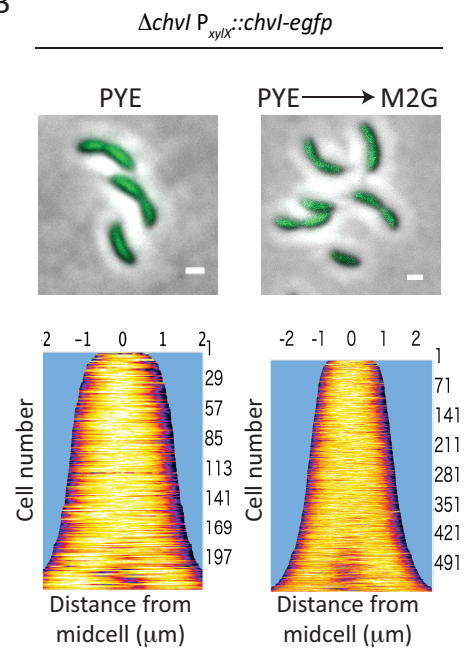

C

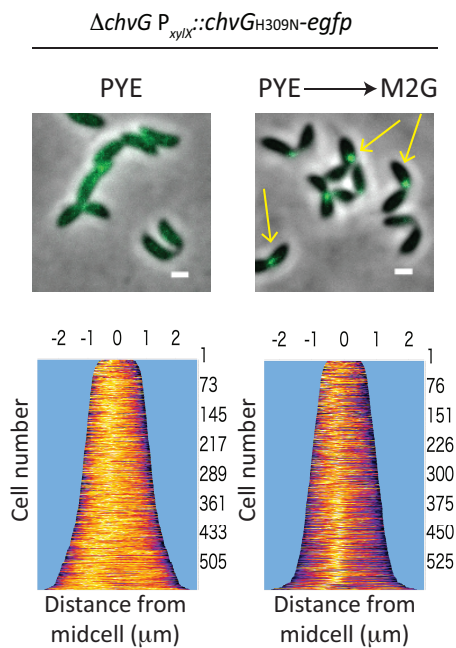

503

504

505

506

507

508

**Fig. 6. ChvG relocates from a patchy-spotty pattern to mid-cell upon osmotic upshift.** (A) Localisation of ChvG-eGFP in cells grown in either M2G or PYE and imaged on M2G or PYE agar pads, respectively; or cells grown in PYE, washed in M2G and imaged on M2G agarose pads (PYE → M2G); or cells grown in M2G, washed in PYE and imaged on PYE agarose pads (M2G → PYE). (B) Localisation of ChvI-eGFP in a  $\Delta chvI$  background and (C) ChvG<sub>H309N</sub>-eGFP in a  $\Delta chvG$  background grown overnight in PYE and imaged on PYE agarose pads or grown in PYE, washed in M2G and imaged on M2G agarose pads (PYE → M2G). Liquid cultures and pads were supplemented with 0.1 % xylose to allow expression of ChvG, ChvI and ChvG<sub>H309N</sub> fused to eGFP fusions. Scale bar= 1  $\mu\text{m}$ .

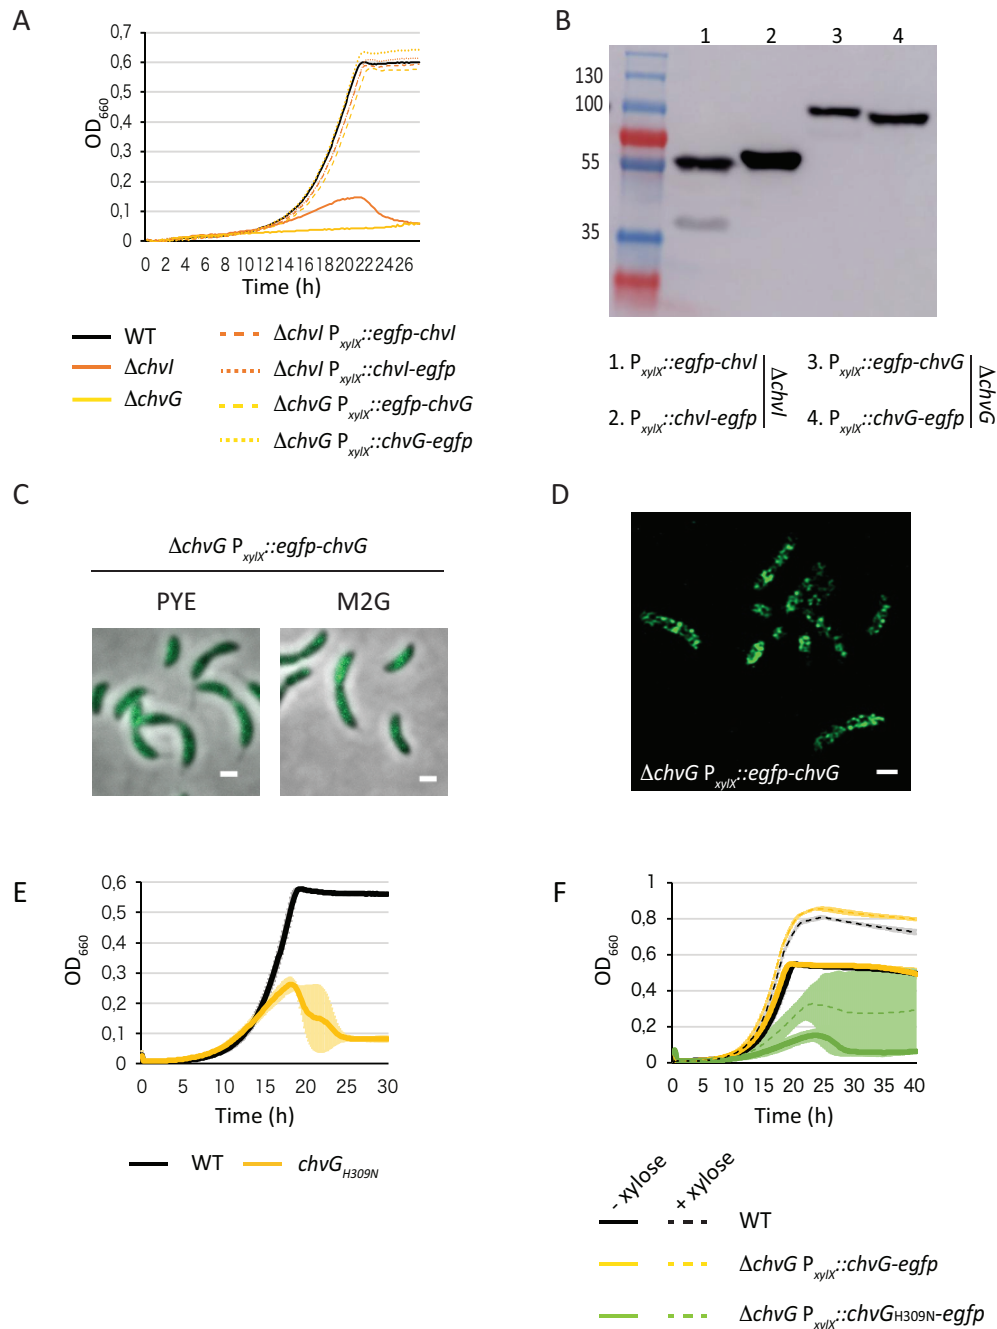

509

510

511

512

513

514

515

**Figure S4. ChvG relocates from a patchy-spotty pattern to mid-cell upon osmotic upshift.**

(A) Growth of  $\Delta chvI$  and  $\Delta chvG$  mutants complemented with *chvI* and *chvG* N- and C-terminal eGFP fusions. (B) Immunodetection of eGFP fusions with GFP antibodies. The expected molecular weights for eGFP, eGFP-ChvI, ChvI-eGFP, eGFP-ChvG and ChvG-eGFP are 26.94, 54.33, 55.75, 85.88, 86.06 kDa, respectively. (C) Localisation of eGFP-ChvG in a  $\Delta chvG$  background grown overnight in PYE and M2G and imaged in PYE and M2G agarose pads, respectively. (D) Confocal microscopy images of  $\Delta chvG$  cells expressing eGFP-ChvG cells grown in PYE. (E-F) Growth upon endogenous (E) and ectopic expression (F) of *chvG*<sub>H309N</sub> in M2G. The data represent the average value of biological replicates (n=3, error bars show standard deviation). Expression of eGFP fusions from P<sub>xyiX</sub> was induced with 0.1 % xylose.

## 516 **The N-terminal extremity of ChvG determines localisation and relocation**

517 ChvG is a HK anchored in the membrane thanks to 2 transmembrane helices which  
518 delimit a periplasmic sensor domain (amino acids 50-221), with a cytoplasmic signal  
519 transduction histidine kinase domain (amino acids 242-534) (Fig. 7A). To assess  
520 which of these ChvG domains are essential for localisation, we fused to mCherry  
521 ChvG versions harbouring either the complete or truncated sensor (ChvG<sub>1-274</sub> and  
522 ChvG<sub>1-114</sub>, respectively) or the catalytic (ChvG<sub>273-534</sub>) domain. First, we confirmed that  
523 full-length ChvG fused to mCherry displayed the same localisation and relocation  
524 patterns (Fig. 7B, F) than the ones described for GFP fusions (Fig. 6A). Interestingly,  
525 the truncated or complete sensor domain alone (ChvG<sub>1-114</sub>, ChvG<sub>1-274</sub>) fused to  
526 mCherry were both localized as patchy-spotty in PYE (Fig. 7C-D). However, only the  
527 ChvG<sub>1-274</sub>-mCherry fusion relocated as foci upon transition to M2G (Fig. 7G-H). Unlike  
528 the sensor domains, the catalytic domain (ChvG<sub>273-534</sub>) fused to mCherry displayed  
529 neither the patchy-spotty nor the foci pattern of localization and was instead diffusely  
530 localized in the cytoplasm (Fig. 7E, I). Altogether, our results indicate that the complete  
531 periplasmic sensor domain of ChvG edged by transmembrane domains are required  
532 for relocation as foci upon osmotic shock whereas the first 114 amino acids are  
533 sufficient to determine the patchy-spotty pattern of localization.

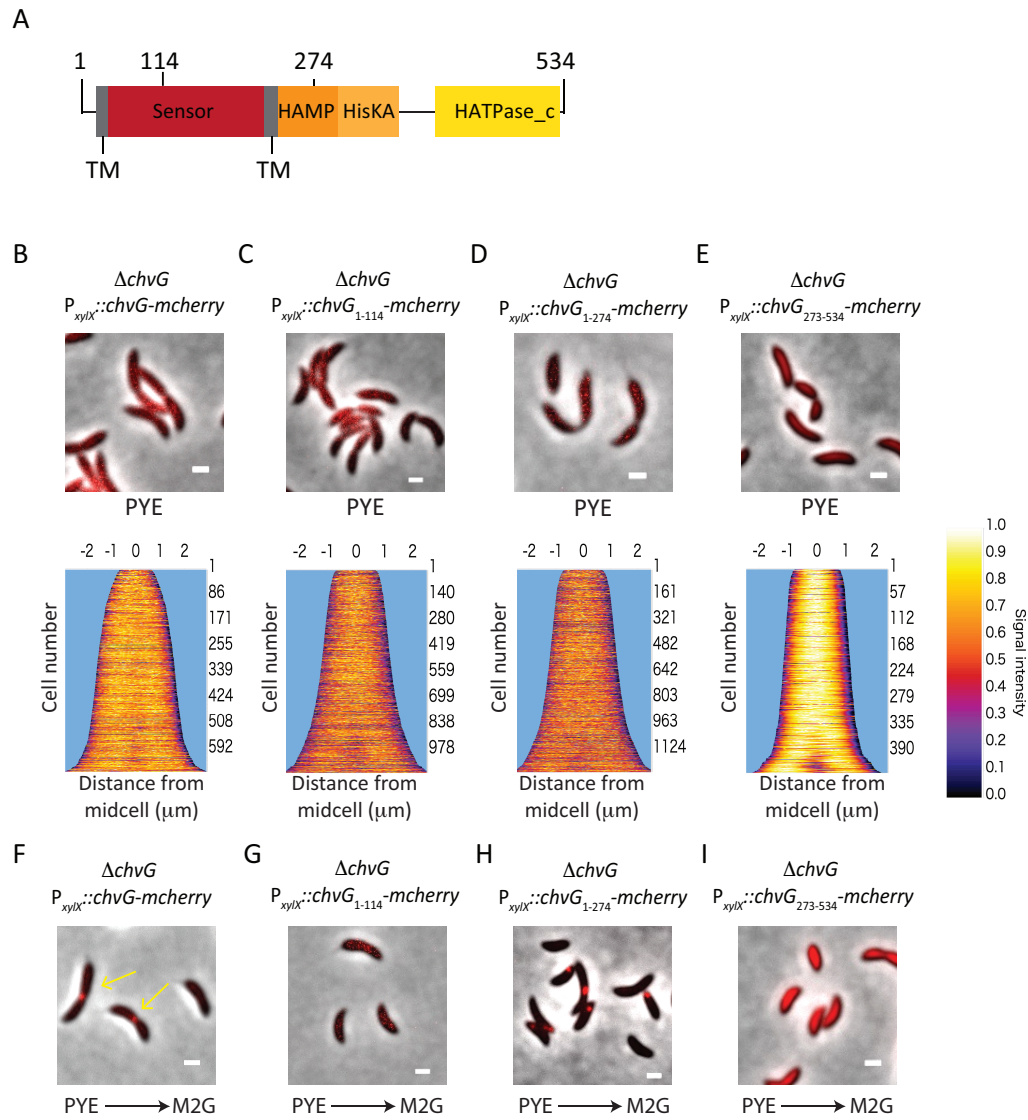

**Fig. 7. Localisation of truncated ChvG variants.** (A) Conserved domains in the HK ChvG and position of the amino acids defining the truncated proteins. (B-I) Localisation of ChvG WT (B, F) and truncated versions (C-E, G-I) in cells grown in PYE and imaged on PYE agarose pads (B-) or in cells grown in PYE, washed in M2G and imaged on M2G agarose pads (PYE → M2G) (F-I). Liquid cultures and pads were supplemented with 0.1 % xylose. Scale bars in microscopy images correspond to 1  $\mu$ m.

## 539 Discussion

540 The  $\alpha$ -proteobacterial TCS ChvGI has conserved cell envelope regulatory functions  
541 (Lamontagne *et al.*, 2007; Heckel *et al.*, 2014; Ratib *et al.*, 2018; Vallet *et al.*, 2020;  
542 Stein *et al.*, 2021), but the exact perceived signal that triggers the ChvG-dependent  
543 phosphorylation of ChvI remains unknown. We found that hyperosmotic shock triggers  
544 ChvI phosphorylation and treatment with antibiotics targeting PG synthesis proteins  
545 induces *chvIG* expression. We also showed that ChvI regulates expression of genes  
546 related to PG synthesis, such as *ftsN* and *dipM*, and to osmotic and oxidative stress  
547 regulation, such as *nepR*, likely explaining why ChvGI system is required for viability  
548 in these stressful conditions. Other targets related to cell envelope architecture,  
549 identified by ChIP-seq and RNA-seq experiments, include genes coding for the  $\beta$ -  
550 barrel assembly machinery (Bam) complex; components of the Tol system; several  
551 outer membrane proteins (OMP) such as RasFa, CCNA\_03820 and CCNA\_01956;  
552 and the cytoplasmic FtsZ-binding protein ZapA. Altogether, our results support a role  
553 for ChvGI in *C. crescentus* as a safeguard of cell envelope homeostasis by sensing  
554 cell wall-related damages and regulating the expression of genes related to cell  
555 division and envelope architecture.

556 We observed that similarly to  $\Delta chvI$ , the endogenous expression of phospho-mimetic  
557 (*chvI<sub>D52E</sub>*) or phospho-ablative (*chvI<sub>D52A</sub>*) failed to grow in hypertonic conditions such  
558 as those found in synthetic minimal media (M2G or M2X). However, ectopic  
559 expression of *chvI<sub>D52E</sub>* partially alleviated growth defect of  $\Delta chvI$  in these conditions, in  
560 agreement with a previous report (Stein *et al.* (2021). These observations indicate that  
561 ChvI phosphorylation dynamics is tightly regulated to ensure optimal growth of *C.*  
562 *crescentus* in hyperosmotic environments. Therefore, an important level of



563 phosphorylated ChvI might be required even in mild cell envelope stress conditions.  
564 In addition, constitutive activation of a cell envelope stress response system can be  
565 detrimental, as already shown in *E. coli* with the sigma factor E ( $\sigma^E$ ), the inner  
566 membrane stress regulator Cpx or the regulator of capsule synthesis Rcs (Missiakas  
567 *et al.*, 1997; Pogliano *et al.*, 1998; De las Peñas *et al.*, 2003; Grabowicz & Silhavy.  
568 2017). Indeed, overactivation of  $\sigma^E$  causes overexpression of sRNAs inhibiting  
569 expression of integral OMPs, therefore weakening the outer membrane integrity  
570 (Nicoloff *et al.*, 2017). Likewise, constitutive Cpx activation disturbs cell division and  
571 morphology causing mis-localisation of FtsZ as well as overexpression of L,D-  
572 transpeptidase enzyme LdtD (Pogliano *et al.*, 1998; Delhaye *et al.*, 2016). Similarly,  
573 overactivation of the RR RcsB results in overexpression of the small outer membrane  
574 lipoprotein OsmB, which is toxic through yet unknown mechanisms (Grabowicz &  
575 Silhavy. 2017). In any of the previous cases, hyperstimulation can lead to deregulation  
576 of cell envelope components.

577 In *C. crescentus*, the general stress response (GSR) sigma factor SigT is also  
578 activated upon osmotic imbalance thanks to a complex network comprising the sRNA  
579 (GsrN), the anti-SigT regulator (NepR), the histidine phosphotransferases (LovK and  
580 PhyK) and the response regulators (MrrA, LovR and PhyR) (Alvarez-Martinez *et al.*,  
581 2007; Lourenço *et al.*, 2011; Foreman *et al.*, 2012; Lori *et al.*, 2018; Tien *et al.*, 2018).  
582 In steady-state conditions, NepR impedes SigT-dependent transcription. Upon either  
583 oxidative stress or osmotic imbalance, the histidine phosphotransferase MrrA  
584 activates PhyK to further phosphorylate PhyR. Once phosphorylated, PhyR~P  
585 interacts with NepR to release SigT from inhibition and allow the expression the SigT-  
586 dependent regulon. Interestingly, we found that ChvIG and GSR are interconnected

587 but this connection is counterintuitive. Indeed, we observed (i) that deletion of *sigT* led  
588 to higher *chvI* promoter activity and (ii) that ChvI directly represses *phyR* expression,  
589 suggesting that ChvI and SigT antagonise each other despite being sensitive to  
590 hyperosmotic conditions. However, we cannot exclude the possibility that the cell  
591 envelope homeostasis is sufficiently disrupted in both single mutants to  
592 correspondingly activate the other functional system, *i.e.* ChvGI in  $\Delta sigT$  through  $P_{chvGI}$   
593 and SigT in  $\Delta chvI$  through  $P_{phyR}$ . Alternatively, the antagonistic regulation might allow  
594 these two systems to respond to different levels of osmotic imbalances. For instance,  
595 activation of ChvGI at low hypertonic conditions could down-regulate GSR whereas  
596 SigT would be sensitive to higher salts concentrations at which ChvGI would be tuned  
597 down.

598 In the absence of a functional ChvGI system, *C. crescentus* cannot propagate in  
599 minimal media except if the TonB-dependent outer membrane protein ChvT or if NtrX  
600 is concomitantly inactivated (Stein *et al.*, 2021). ChvGI is known to indirectly down-  
601 regulate ChvT by directly activating the expression of the sRNA ChvR (Fröhlich *et al.*,  
602 2018). Our ChIP-seq data showed that ChvI also likely regulates *chvT* expression  
603 directly by binding to its promoter region. This dual – transcriptional and post-  
604 transcriptional – control indicates the ChvT outer membrane protein is an important  
605 player in cell envelope homeostasis. In support of that, a  $\Delta chvI \Delta chvT$  double mutant  
606 grew better than a  $\Delta chvI$  single one in hyperosmotic regimes. Interestingly, NtrXY has  
607 been also described as a cell envelope regulator in  $\alpha$ -proteobacteria. NtrYX controls  
608 succinoglycan and exopolysaccharide (EPS) production, and salt stress response in  
609 *S. meliloti* (Wang *et al.*, 2013; Calatrava *et al.*, 2017). In *Rhodobacter sphaeroides*,  
610 NtrXY confers resistance to membrane disruptive agents and regulates the expression

611 of genes coding for PG and EPS synthesis enzymes, lipoproteins and cell division  
612 proteins (Lemmer *et al.*, 2017; Lemmer *et al.*, 2020). Thus, confirming that *ntrX*  
613 inactivation in a  $\Delta chvI$  background partially restored growth in the presence of high  
614 concentration of osmolytes further supports the importance of the NtrZXY system,  
615 together with ChvGI, in the cell envelope stress response in  $\alpha$ -proteobacteria.

616 We showed that ChvGI also regulates sensitivity to the antibiotic mecillinam that  
617 inhibits PG transpeptidation. Previously, Vallet *et al.* (2020) showed that *chvI* mutants  
618 failed to grow when exposed to vancomycin, which also impedes PG crosslinking by  
619 directly interacting with the D-Ala-D-Ala moiety of the PG precursors. Here, we showed  
620 that  $\Delta chvI$  cells were sensitized to mecillinam and to a lesser extent to vancomycin.  
621 However, although both antibiotics inhibits the transpeptidation step of PG synthesis,  
622 only mecillinam treatment induced *chvIG* expression. This is likely due to the fact that  
623 intracellular concentrations of vancomycin remain low in WT cells since the TonB-  
624 dependent receptor ChvT is poorly expressed and incorporated in outer membrane.

625 However, treatment with cefixime, cefotaxime and sodium deoxycholate did not show  
626 differences in cell viability between WT and  $\Delta chvI$  cells (Vallet *et al.* 2020).  
627 Furthermore, the activation of *chvR* expression upon cefotaxime or sodium  
628 deoxycholate exposure was shown to be ChvI-independent. In addition, we showed  
629 here that  $\Delta chvI$  cells were not more sensitive to treatment with SDS, polymyxin B or  
630 the MreB inhibitor A22. Considering that MreB is a key cytoplasmic component of the  
631 elongasome complex, of which PBP2 and other proteins are part, it is therefore likely  
632 that ChvGI rather senses specific targets in the periplasm to assess cell envelope  
633 stress. Notwithstanding that, other stress response systems, yet to be discovered or

634 characterised in the context of the aforementioned stressors, might be involved in  
635 responding to the damages that do not activate ChvGI.

636 We observed that ChvG has a patchy-spotty pattern localisation when grown in  
637 complex and synthetic minimal media, while it relocates as foci at mid-cell upon  
638 transition from complex to minimal media. The patchy-spotty localisation pattern has  
639 been described for multiple PG-related proteins in *C. crescentus*, including MreB,  
640 MreC, Pal, PBP1A, PBP2, RodA, TolB (Figge *et al.*, 2004; Divakaruni *et al.*, 2005;  
641 Werner *et al.*, 2009; Hocking *et al.*, 2012; Billini *et al.*, 2019). Moreover, RodA, PBP2,  
642 PBP1A, which are proteins involved in PG polymerization and crosslinking, have been  
643 reported to relocate at mid-cell upon osmotic upshift in a FtsZ-dependent but MreB-  
644 independent manner (Hocking *et al.*, 2012). It would be interesting to check whether  
645 this ChvG localisation patterns are conserved among  $\alpha$ -proteobacteria, in particular in  
646 Rhizobiales since they do not encode MreB orthologs. In *E. coli*, it has been reported  
647 that the PBP2 periplasmic portion physically interacts with those of PBP1A and RodA  
648 to mediate PG assembly and to ensure proper cell elongation (Banzhaf *et al.*, 2012;  
649 van der Ploeg *et al.*, 2015). It is yet to determine whether ChvG interacts with PBP2,  
650 PBP1a, RodA and/or others with similar localisation patterns. Nonetheless, it is  
651 tempting to speculate that ChvG interacts and co-localises with PG-related enzymes  
652 as a cell envelope safeguard system in  $\alpha$ -proteobacteria. A recent study in the Gram-  
653 positive bacterium *Bacillus thuringiensis* showed that upon treatment with the  
654 antibiotic cefoxitin, the putative PBP protein PbpP derepresses the extracytoplasmic  
655 function sigma factor P ( $\sigma^P$ ) which increases resistance to  $\beta$ -lactams (Nauta *et al.*,  
656 2021). Future experiments will aim to determine the ChvG interactome under cell  
657 envelope undisturbed and threatening conditions, and dissect its activation

658 mechanism as well as its connection with the general stress response, not only in *C.*  
659 *crescentus* but also in other  $\alpha$ -proteobacteria.

660

## 661 **Acknowledgments**

662 We are grateful to Clare Kirkpatrick, Sean Crosson and Benjamin Stein for willingness  
663 to discuss and share data on their ChvGI-related projects. Also, we would like to thank  
664 members of the URBM of the University of Namur for their comments and suggestions  
665 on this project, especially Dr. Angéline Reboul from her comments and advices on the  
666 microscopy analysis. This work was supported by the Fonds de la Recherche  
667 Scientifique – FNRS (F.R.S. – FNRS) with a Welbio Starting Grant (WELBIO-CR-  
668 2019S-05) to R.H. A.Q-Y. was supported by a postdoctoral fellowship from the  
669 University of Namur (UNamur). R.H. is a Research Associate of F.R.S. – FNRS.

670

## 671 **Author Contributions**

672 A.Q-Y. and R.H. conceived and designed the experiments. A.Q-Y. performed all the  
673 experiments except otherwise stated. A.M. purified the ChvI protein and helped with  
674 some plasmids constructs. A.Q-Y., J.C. and R.H. analyzed the data. A.Q-Y. and R.H.  
675 wrote the paper.

676

## 677 **Competing financial interests**

678 The authors declare no competing financial interests.

679

## 680 References

- 681 Afgan, E., Baker, D., Batut, B., Van Den Beek, M., Bouvier, D., Čech, M., ... &  
682 Blankenberg, D. (2018). The Galaxy platform for accessible, reproducible and  
683 collaborative biomedical analyses: 2018 update. *Nucleic acids research*, *46*(W1),  
684 W537-W544.
- 685  
686 Altamirano-Silva, P., Meza-Torres, J., Castillo-Zeledón, A., Ruiz-Villalobos, N.,  
687 Zuñiga-Pereira, A. M., Chacón-Díaz, C., ... & Chaves-Olarte, E. (2018). *Brucella*  
688 *abortus* senses the intracellular environment through the BvrR/BvrS two-component  
689 system, which allows *B. abortus* to adapt to its replicative niche. *Infection and*  
690 *immunity*, *86*(4), e00713-17.
- 691  
692 Alvarez-Martinez, C. E., Lourenço, R. F., Baldini, R. L., Laub, M. T., & Gomes, S. L.  
693 (2007). The ECF sigma factor  $\sigma_T$  is involved in osmotic and oxidative stress responses  
694 in *Caulobacter crescentus*. *Molecular microbiology*, *66*(5), 1240-1255.
- 695  
696 Banzhaf, M., van den Berg van Saparoea, B., Terrak, M., Fraipont, C., Egan, A.,  
697 Philippe, J., ... & Vollmer, W. (2012). Cooperativity of peptidoglycan synthases active  
698 in bacterial cell elongation. *Molecular microbiology*, *85*(1), 179-194.
- 699  
700 Billini, M., Biboy, J., Kühn, J., Vollmer, W., & Thanbichler, M. (2019). A specialized  
701 MreB-dependent cell wall biosynthetic complex mediates the formation of stalk-  
702 specific peptidoglycan in *Caulobacter crescentus*. *PLoS genetics*, *15*(2), e1007897.
- 703  
704 Calatrava-Morales, N., Nogales, J., Amezttoy, K., van Steenberg, B., & Soto, M. J.  
705 (2017). The NtrY/NtrX system of *Sinorhizobium meliloti* GR4 regulates motility, EPS I  
706 production, and nitrogen metabolism but is dispensable for symbiotic nitrogen  
707 fixation. *Molecular Plant-Microbe Interactions*, *30*(7), 566-577.
- 708  
709 Capra, E. J., & Laub, M. T. (2012). Evolution of two-component signal transduction  
710 systems. *Annual review of microbiology*, *66*, 325-347.
- 711  
712 Carrica, M. D. C., Fernandez, I., Martí, M. A., Paris, G., & Goldbaum, F. A. (2012).  
713 The NtrY/X two-component system of *Brucella* spp. acts as a redox sensor and  
714 regulates the expression of nitrogen respiration enzymes. *Molecular*  
715 *microbiology*, *85*(1), 39-50.
- 716  
717 Chen, E. J., Sabio, E. A., & Long, S. R. (2008). The periplasmic regulator ExoR inhibits  
718 ExoS/ChvI two-component signalling in *Sinorhizobium meliloti*. *Molecular*  
719 *microbiology*, *69*(5), 1290-1303.
- 720  
721 Cho, S. H., Szewczyk, J., Pesavento, C., Zietek, M., Banzhaf, M., Roszczenko, P., ...  
722 & Collet, J. F. (2014). Detecting envelope stress by monitoring  $\beta$ -barrel  
723 assembly. *Cell*, *159*(7), 1652-1664.
- 724  
725 Christen, M., Beusch, C., Bösch, Y., Cerletti, D., Flores-Tinoco, C. E., Del Medico, L.,  
726 ... & Christen, B. (2016). Quantitative selection analysis of bacteriophage  $\phi$ CbK

- 727 susceptibility in *Caulobacter crescentus*. *Journal of molecular biology*, 428(2), 419-  
728 430.
- 729
- 730 De Las Peñas, A., Connolly, L., & Gross, C. A. (1997). The  $\sigma^E$ -mediated response to  
731 extracytoplasmic stress in *Escherichia coli* is transduced by RseA and RseB, two  
732 negative regulators of  $\sigma^E$ . *Molecular microbiology*, 24(2), 373-385.
- 733
- 734 Delhaye, A., Collet, J. F., & Laloux, G. (2016). Fine-tuning of the Cpx envelope stress  
735 response is required for cell wall homeostasis in *Escherichia coli*. *MBio*, 7(1), e00047-  
736 16.
- 737
- 738 Divakaruni, A. V., Loo, R. R. O., Xie, Y., Loo, J. A., & Gober, J. W. (2005). The cell-  
739 shape protein MreC interacts with extracytoplasmic proteins including cell wall  
740 assembly complexes in *Caulobacter crescentus*. *Proceedings of the National  
741 Academy of Sciences*, 102(51), 18602-18607.
- 742
- 743 Ducret, A., Quardokus, E. M., & Brun, Y. V. (2016). MicrobeJ, a tool for high throughput  
744 bacterial cell detection and quantitative analysis. *Nature Microbiol* 1: 16077.
- 745
- 746 Figge, R. M., Divakaruni, A. V., & Gober, J. W. (2004). MreB, the cell shape-  
747 determining bacterial actin homologue, co-ordinates cell wall morphogenesis in  
748 *Caulobacter crescentus*. *Molecular microbiology*, 51(5), 1321-1332.
- 749
- 750 Foreman, R., Fiebig, A., & Crosson, S. (2012). The LovK-LovR two-component system  
751 is a regulator of the general stress pathway in *Caulobacter crescentus*. *Journal of  
752 bacteriology*, 194(12), 3038-3049.
- 753
- 754 Gao, R., & Stock, A. M. (2009). Biological insights from structures of two-component  
755 proteins. *Annual review of microbiology*, 63, 133-154
- 756
- 757 Geiger, O., Sohlenkamp, C., Vera-Cruz, D., Medeot, D. B., Martínez-Aguilar, L.,  
758 Sahonero-Canavesi, D. X., ... & López-Lara, I. M. (2021). ExoS/ChvI two-component  
759 signal-transduction system activated in the absence of bacterial  
760 phosphatidylcholine. *Frontiers in plant science*, 12.
- 761
- 762 Goulian, M. (2010). Two-component signaling circuit structure and properties. *Current  
763 opinion in microbiology*, 13(2), 184-189.
- 764
- 765 Grabowicz, M., & Silhavy, T. J. (2017). Redefining the essential trafficking pathway for  
766 outer membrane lipoproteins. *Proceedings of the National Academy of  
767 Sciences*, 114(18), 4769-4774
- 768
- 769 Heckel, B. C., Tomlinson, A. D., Morton, E. R., Choi, J. H., & Fuqua, C. (2014).  
770 *Agrobacterium tumefaciens* *exoR* controls acid response genes and impacts  
771 exopolysaccharide synthesis, horizontal gene transfer, and virulence gene  
772 expression. *Journal of bacteriology*, 196(18), 3221-3233.
- 773

- 774 Hocking, J., Priyadarshini, R., Takacs, C. N., Costa, T., Dye, N. A., Shapiro, L., ... &  
775 Jacobs-Wagner, C. (2012). Osmolality-dependent relocation of penicillin-binding  
776 protein PBP2 to the division site in *Caulobacter crescentus*. *Journal of*  
777 *bacteriology*, *194*(12), 3116-3127.  
778
- 779 Huynh, T. N., & Stewart, V. (2011). Negative control in two-component signal  
780 transduction by transmitter phosphatase activity. *Molecular microbiology*, *82*(2), 275-  
781 286.  
782
- 783 Jubelin, G., Vianney, A., Beloin, C., Ghigo, J. M., Lazzaroni, J. C., Lejeune, P., & Dorel,  
784 C. (2005). CpxR/OmpR interplay regulates curli gene expression in response to  
785 osmolarity in *Escherichia coli*. *Journal of bacteriology*, *187*(6), 2038-2049.  
786
- 787 Lamontagne, J., Butler, H., Chaves-Olarte, E., Hunter, J., Schirm, M., Paquet, C., ...  
788 & Paramithiotis, E. (2007). Extensive cell envelope modulation is associated with  
789 virulence in *Brucella abortus*. *Journal of proteome research*, *6*(4), 1519-1529.  
790
- 791 Laubacher, M. E., & Ades, S. E. (2008). The Rcs phosphorelay is a cell envelope  
792 stress response activated by peptidoglycan stress and contributes to intrinsic antibiotic  
793 resistance. *Journal of bacteriology*, *190*(6), 2065-2074.  
794
- 795 Lemmer, K. C., Alberge, F., Myers, K. S., Dohnalkova, A. C., Schaub, R. E., Lenz, J.  
796 D., ... & Donohue, T. J. (2020). The NtrYX two-component system regulates the  
797 bacterial cell envelope. *Mbio*, *11*(3), e00957-20.  
798
- 799 Lemmer, K. C., Zhang, W., Langer, S. J., Dohnalkova, A. C., Hu, D., Lemke, R. A., ...  
800 & Donohue, T. J. (2017). Mutations that alter the bacterial cell envelope increase lipid  
801 production. *Mbio*, *8*(3), e00513-17.  
802
- 803 Li, L., Jia, Y., Hou, Q., Charles, T. C., Nester, E. W., & Pan, S. Q. (2002). A global pH  
804 sensor: *Agrobacterium* sensor protein ChvG regulates acid-inducible genes on its two  
805 chromosomes and Ti plasmid. *Proceedings of the National Academy of*  
806 *Sciences*, *99*(19), 12369-12374.  
807
- 808 Lori, C., Kaczmarczyk, A., de Jong, I., & Jenal, U. (2018). A single-domain response  
809 regulator functions as an integrating hub to coordinate general stress response and  
810 development in Alphaproteobacteria. *MBio*, *9*(3), e00809-18.  
811
- 812 Lourenço, R. F., Kohler, C., & Gomes, S. L. (2011). A two-component system, an anti-  
813 sigma factor and two paralogous ECF sigma factors are involved in the control of  
814 general stress response in *Caulobacter crescentus*. *Molecular microbiology*, *80*(6),  
815 1598-1612.  
816
- 817 Mantis, N. J., & Winans, S. C. (1993). The chromosomal response regulatory gene  
818 *chvI* of *Agrobacterium tumefaciens* complements an *Escherichia coli* *phoB* mutation  
819 and is required for virulence. *Journal of bacteriology*, *175*(20), 6626-6636.  
820



- 821 Mirabella, A., Terwagne, M., Zygmunt, M. S., Cloeckert, A., De Bolle, X., & Letesson,  
822 J. J. (2013). *Brucella melitensis* MucR, an orthologue of *Sinorhizobium meliloti* MucR,  
823 is involved in resistance to oxidative, detergent, and saline stresses and cell envelope  
824 modifications. *Journal of bacteriology*, 195(3), 453-465.  
825
- 826 Missiakas, D., Mayer, M. P., Lemaire, M., Georgopoulos, C., & Raina, S. (1997).  
827 Modulation of the *Escherichia coli*  $\sigma^E$  (RpoE) heat-shock transcription-factor activity  
828 by the RseA, RseB and RseC proteins. *Molecular microbiology*, 24(2), 355-371.  
829
- 830 Nauta, K. M., Ho, T. D., & Ellermeier, C. D. (2021). The Penicillin-Binding Protein PbpP  
831 Is a Sensor of  $\beta$ -Lactams and Is Required for Activation of the Extracytoplasmic  
832 Function  $\sigma$  Factor  $\sigma^P$  in *Bacillus thuringiensis*. *Mbio*, 12(2), e00179-21.  
833
- 834 Nicoloff, H., Gopalkrishnan, S., & Ades, S. E. (2017). Appropriate regulation of the  $\sigma^E$ -  
835 dependent envelope stress response is necessary to maintain cell envelope integrity  
836 and stationary-phase survival in *Escherichia coli*. *Journal of bacteriology*, 199(12),  
837 e00089-17.  
838
- 839 Pawlowski, K., Klosse, U., & De Bruijn, F. J. (1991). Characterization of a novel  
840 *Azorhizobium caulinodans* ORS571 two-component regulatory system, NtrY/NtrX,  
841 involved in nitrogen fixation and metabolism. *Molecular and General Genetics*  
842 *MGG*, 231(1), 124-138.  
843
- 844 Pini, F., De Nisco, N. J., Ferri, L., Penterman, J., Fioravanti, A., Brilli, M., ... & Biondi,  
845 E. G. (2015). Cell cycle control by the master regulator CtrA in *Sinorhizobium*  
846 *meliloti*. *PLoS genetics*, 11(5), e1005232.  
847
- 848 Pogliano, J., Dong, J. M., De Wulf, P., Furlong, D., Boyd, D., Losick, R., ... & Lin, E.  
849 C. C. (1998). Aberrant cell division and random FtsZ ring positioning in *Escherichia*  
850 *coli* *cpxA*\* mutants. *Journal of bacteriology*, 180(13), 3486-3490.  
851
- 852 Raivio, T. L., & Silhavy, T. J. (1997). Transduction of envelope stress in *Escherichia*  
853 *coli* by the Cpx two-component system. *Journal of bacteriology*, 179(24), 7724-7733.  
854
- 855 Ratib, N. R., Sabio, E. Y., Mendoza, C., Barnett, M. J., Clover, S. B., Ortega, J. A., ...  
856 & Chen, E. J. (2018). Genome-wide identification of genes directly regulated by ChvI  
857 and a consensus sequence for ChvI binding in *Sinorhizobium meliloti*. *Molecular*  
858 *microbiology*, 110(4), 596-615.  
859
- 860 Stein, B. J., Fiebig, A., & Crosson, S. (2021). The ChvG–ChvI and NtrY–NtrX two-  
861 component systems coordinately regulate growth of *Caulobacter crescentus*. *Journal*  
862 *of Bacteriology*, JB-00199.  
863
- 864 Stock, A. M., Robinson, V. L., & Goudreau, P. N. (2000). Two-component signal  
865 transduction. *Annual review of biochemistry*, 69(1), 183-215.  
866
- 867 Thanbichler, M., & Shapiro, L. (2006). MipZ, a spatial regulator coordinating  
868 chromosome segregation with cell division in *Caulobacter*. *Cell*, 126(1), 147-162.

- 869  
870 Thanbichler, M., Iniesta, A. A., & Shapiro, L. (2007). A comprehensive set of plasmids for vanillate-and  
871 xylose-inducible gene expression in *Caulobacter crescentus*. *Nucleic acids research*, *35*(20), e137-  
872 e137.  
873  
874 Tien, M. Z., Stein, B. J., & Crosson, S. (2018). Coherent feedforward regulation of gene expression by  
875 *Caulobacter*  $\sigma^T$  and GsrN during hyperosmotic stress. *Journal of bacteriology*, *200*(19), e00349-18.  
876  
877 Vallet, S. U., Hansen, L. H., Bistrup, F. C., Laursen, S. A., Chapalay, J. B., Chambon, M., ... &  
878 Kirkpatrick, C. L. (2020). Loss of bacterial cell pole stabilization in *caulobacter crescentus* sensitizes to  
879 outer membrane stress and peptidoglycan-directed antibiotics. *Mbio*, *11*(3), e00538-20.  
880  
881 Van der Ploeg, R., Goudelis, S. T., & Den Blaauwen, T. (2015). Validation of FRET assay for the  
882 screening of growth inhibitors of *Escherichia coli* reveals elongasome assembly dynamics. *International*  
883 *journal of molecular sciences*, *16*(8), 17637-17654.  
884  
885 Wang, D., Xue, H., Wang, Y., Yin, R., Xie, F., & Luo, L. (2013). The *Sinorhizobium meliloti ntrX* gene is  
886 involved in succinoglycan production, motility, and symbiotic nodulation on alfalfa. *Applied and*  
887 *environmental microbiology*, *79*(23), 7150-7159.  
888  
889 Werner, J. N., Chen, E. Y., Guberman, J. M., Zippilli, A. R., Irgon, J. J., & Gitai, Z. (2009). Quantitative  
890 genome-scale analysis of protein localization in an asymmetric bacterium. *Proceedings of the National*  
891 *Academy of Sciences*, *106*(19), 7858-7863  
892  
893 Wu, C. F., Lin, J. S., Shaw, G. C., & Lai, E. M. (2012). Acid-induced type VI secretion system is regulated  
894 by ExoR-ChvG/ChvI signaling cascade in *Agrobacterium tumefaciens*. *PLoS Pathog.* *8*, e1002938
